# Supplementary material for: Humans actively sample evidence to support prior beliefs
Source: eLife journal article supplement (doi:10.7554/elife.71768), 2022-04-11
Supplement: supp [file elife-71768-supp-v1.zip]

Archive with 19 entries (19 files):
- elife_poa_e71768_Transparent_Reporting_File.docx
- elife_poa_e71768_Figure_2_figure_supplement_1.pdf
- elife_poa_e71768_Figure_3_figure_supplement_1.pdf
- elife_poa_e71768_Figure_4_figure_supplement_1.pdf
- elife_poa_e71768_Figure_4_figure_supplement_2.pdf
- elife_poa_e71768_Figure_4_figure_supplement_3.pdf
- elife_poa_e71768_Figure_4_figure_supplement_4.pdf
- elife_poa_e71768_Figure_4_figure_supplement_5.pdf
- elife_poa_e71768_Figure_4_figure_supplement_6.pdf
- elife_poa_e71768_Figure_4_figure_supplement_7.pdf
- elife_poa_e71768_Figure_4_figure_supplement_8.pdf
- elife_poa_e71768_Figure_4_figure_supplement_9.pdf
- elife_poa_e71768_Figure_4_figure_supplement_10.pdf
- elife_poa_e71768_Figure_4_figure_supplement_11.pdf
- elife_poa_e71768_Figure_4_figure_supplement_12.pdf
- elife_poa_e71768_Figure_5_figure_supplement_1.png
- elife_poa_e71768_Figure_5_figure_supplement_2.png
- elife_poa_e71768_Figure_5_figure_supplement_3.png
- elife_poa_e71768_Figure_5_figure_supplement_4.png
