# Supplementary material for: Humans actively sample evidence to support prior beliefs
Source: eLife journal article supplement (doi:10.7554/elife.71768), 2022-04-11

## Sampling Time per Patch (Study 2 - 3000ms)

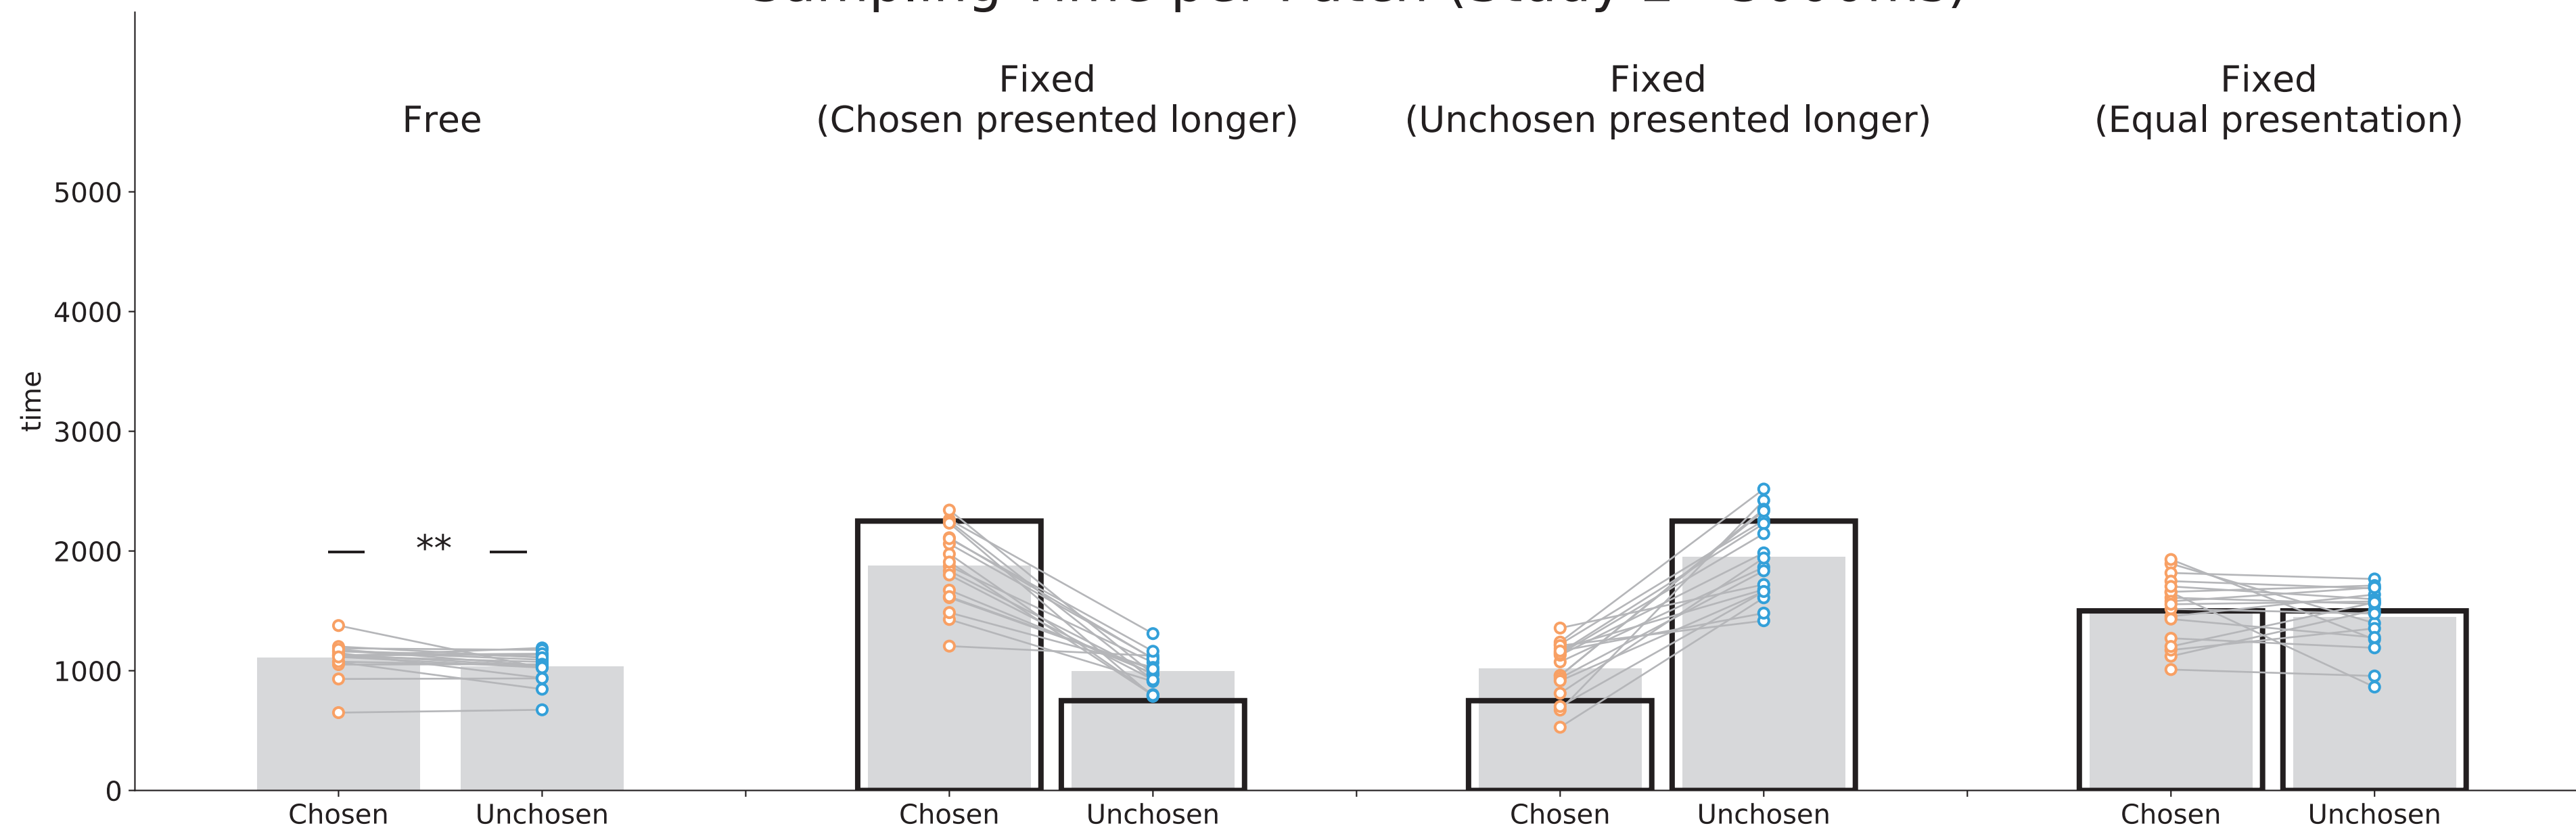

## Sampling Time per Patch (Study 2 - 5000ms)

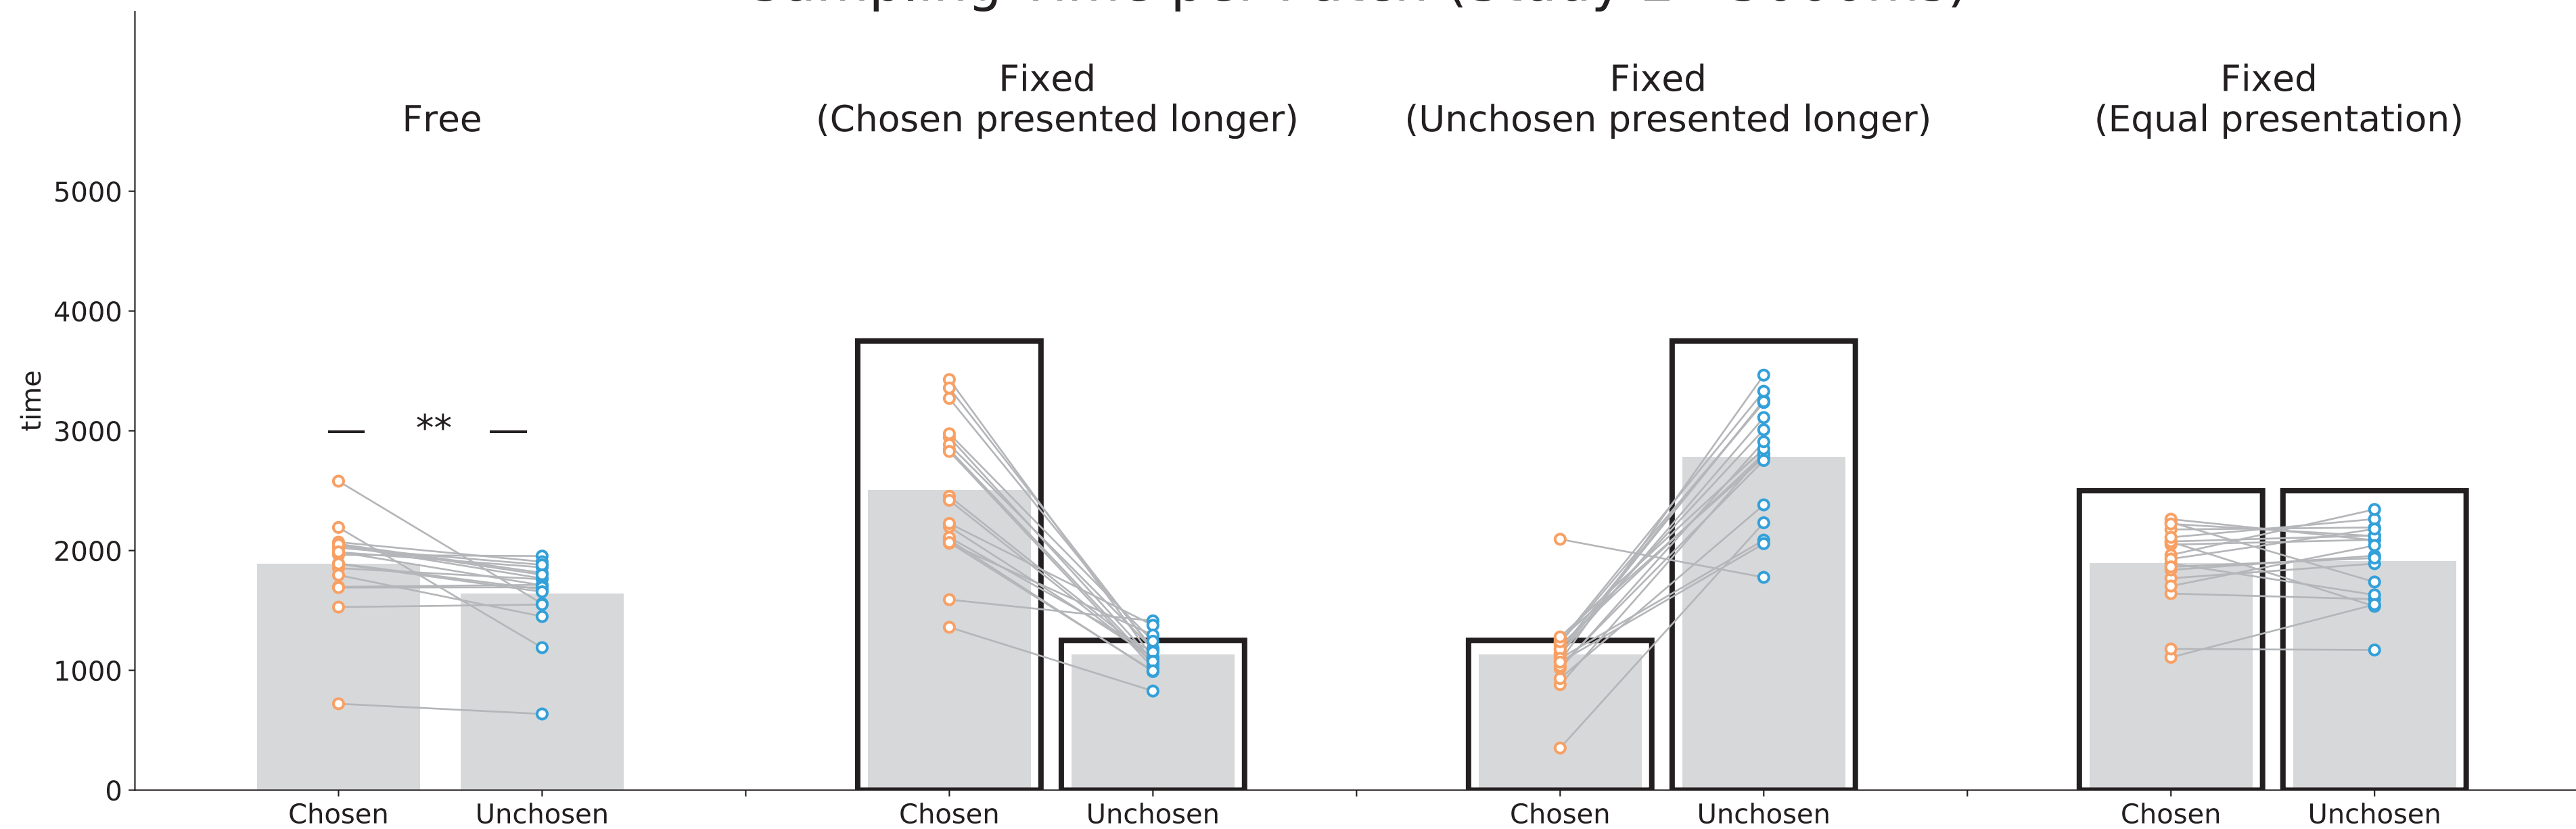

## Sampling Time per Patch (Study 2 - 7000ms)

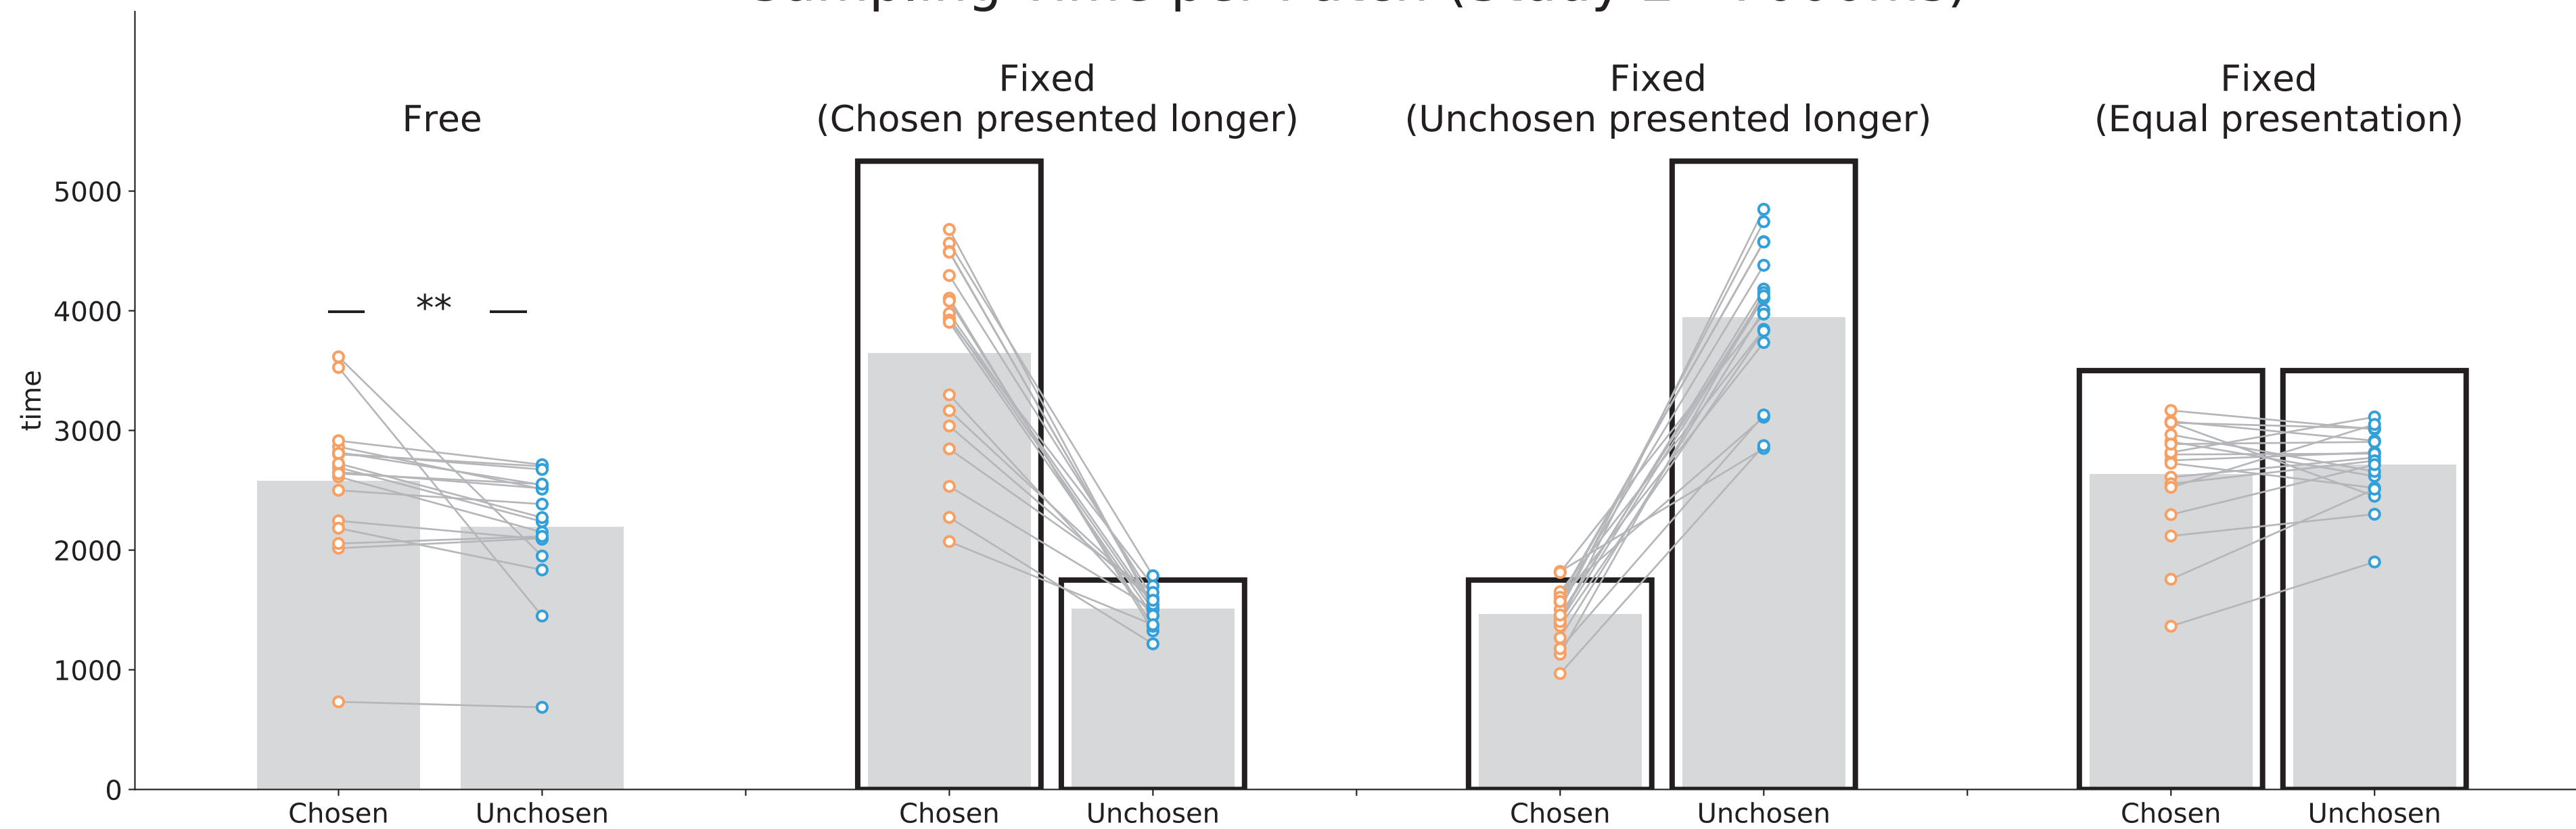

Supplement: supp [file elife-71768-supp-v1.zip › elife_poa_e71768_Figure_3_figure_supplement_1.pdf]
