# Supplementary figures and images for: Humans actively sample evidence to support prior beliefs
Source: eLife journal article supplement (doi:10.7554/elife.71768), 2022-04-11

## Confidence - Choice 2

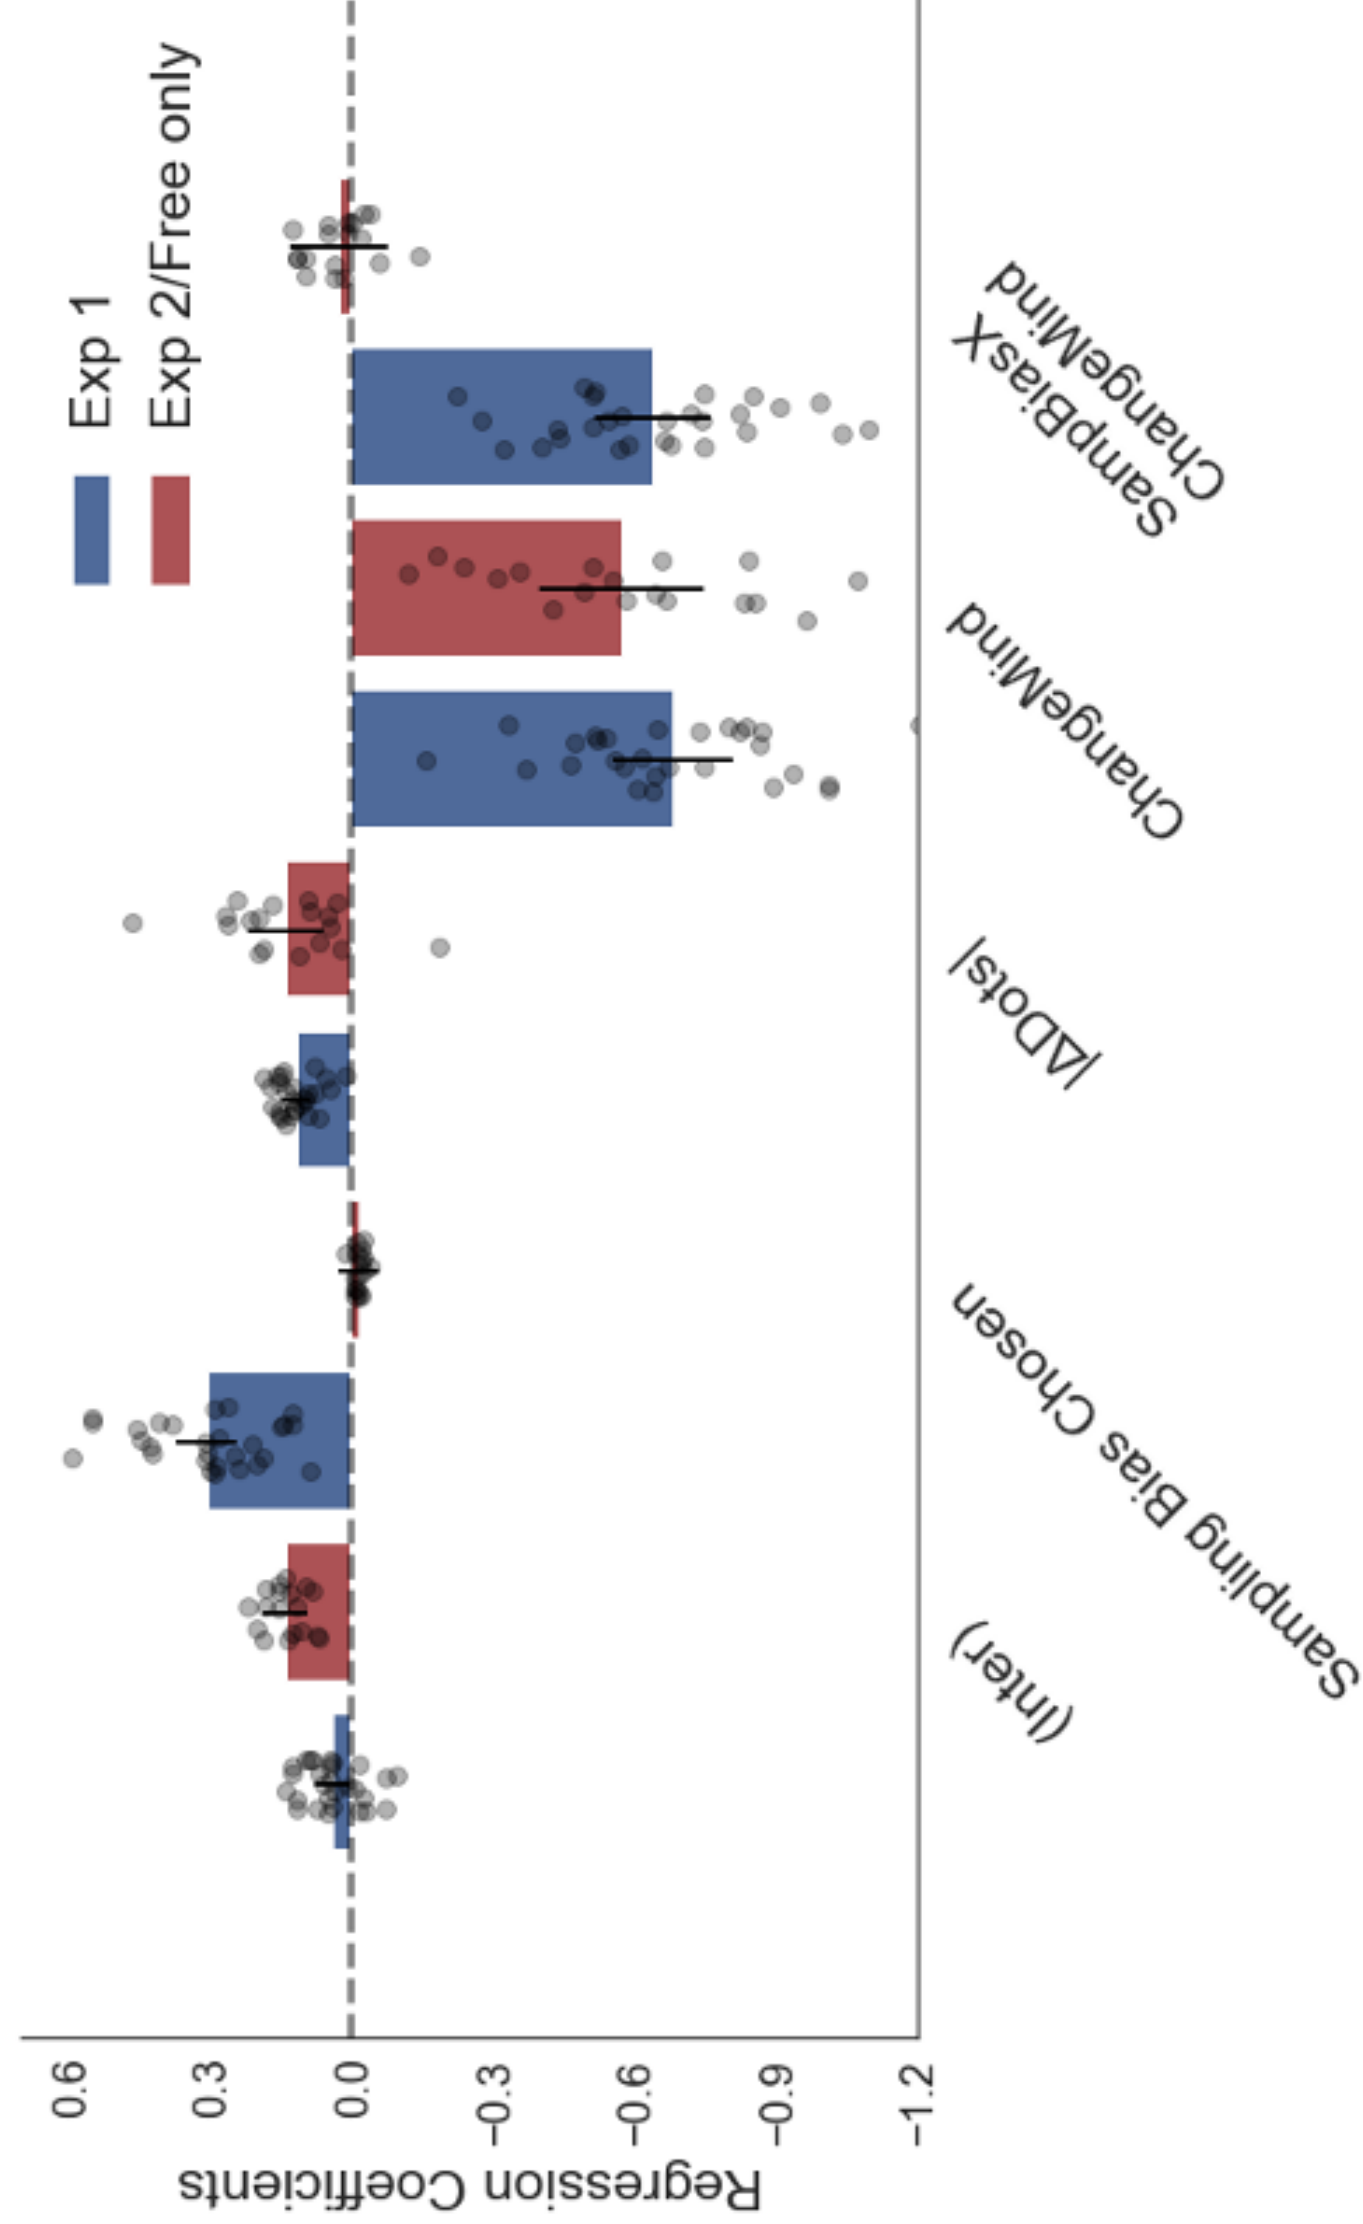

Supplement: supp [file elife-71768-supp-v1.zip › elife_poa_e71768_Figure_2_figure_supplement_1.pdf]

## Total Sampling Time (Study 2)

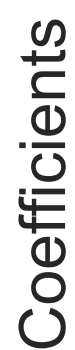

0.0

-0.5

Dot Difference

Confidence

\*\*\*

Supplement: supp [file elife-71768-supp-v1.zip › elife_poa_e71768_Figure_4_figure_supplement_1.pdf]

# Sampling bias only affects choice in free sampling trials

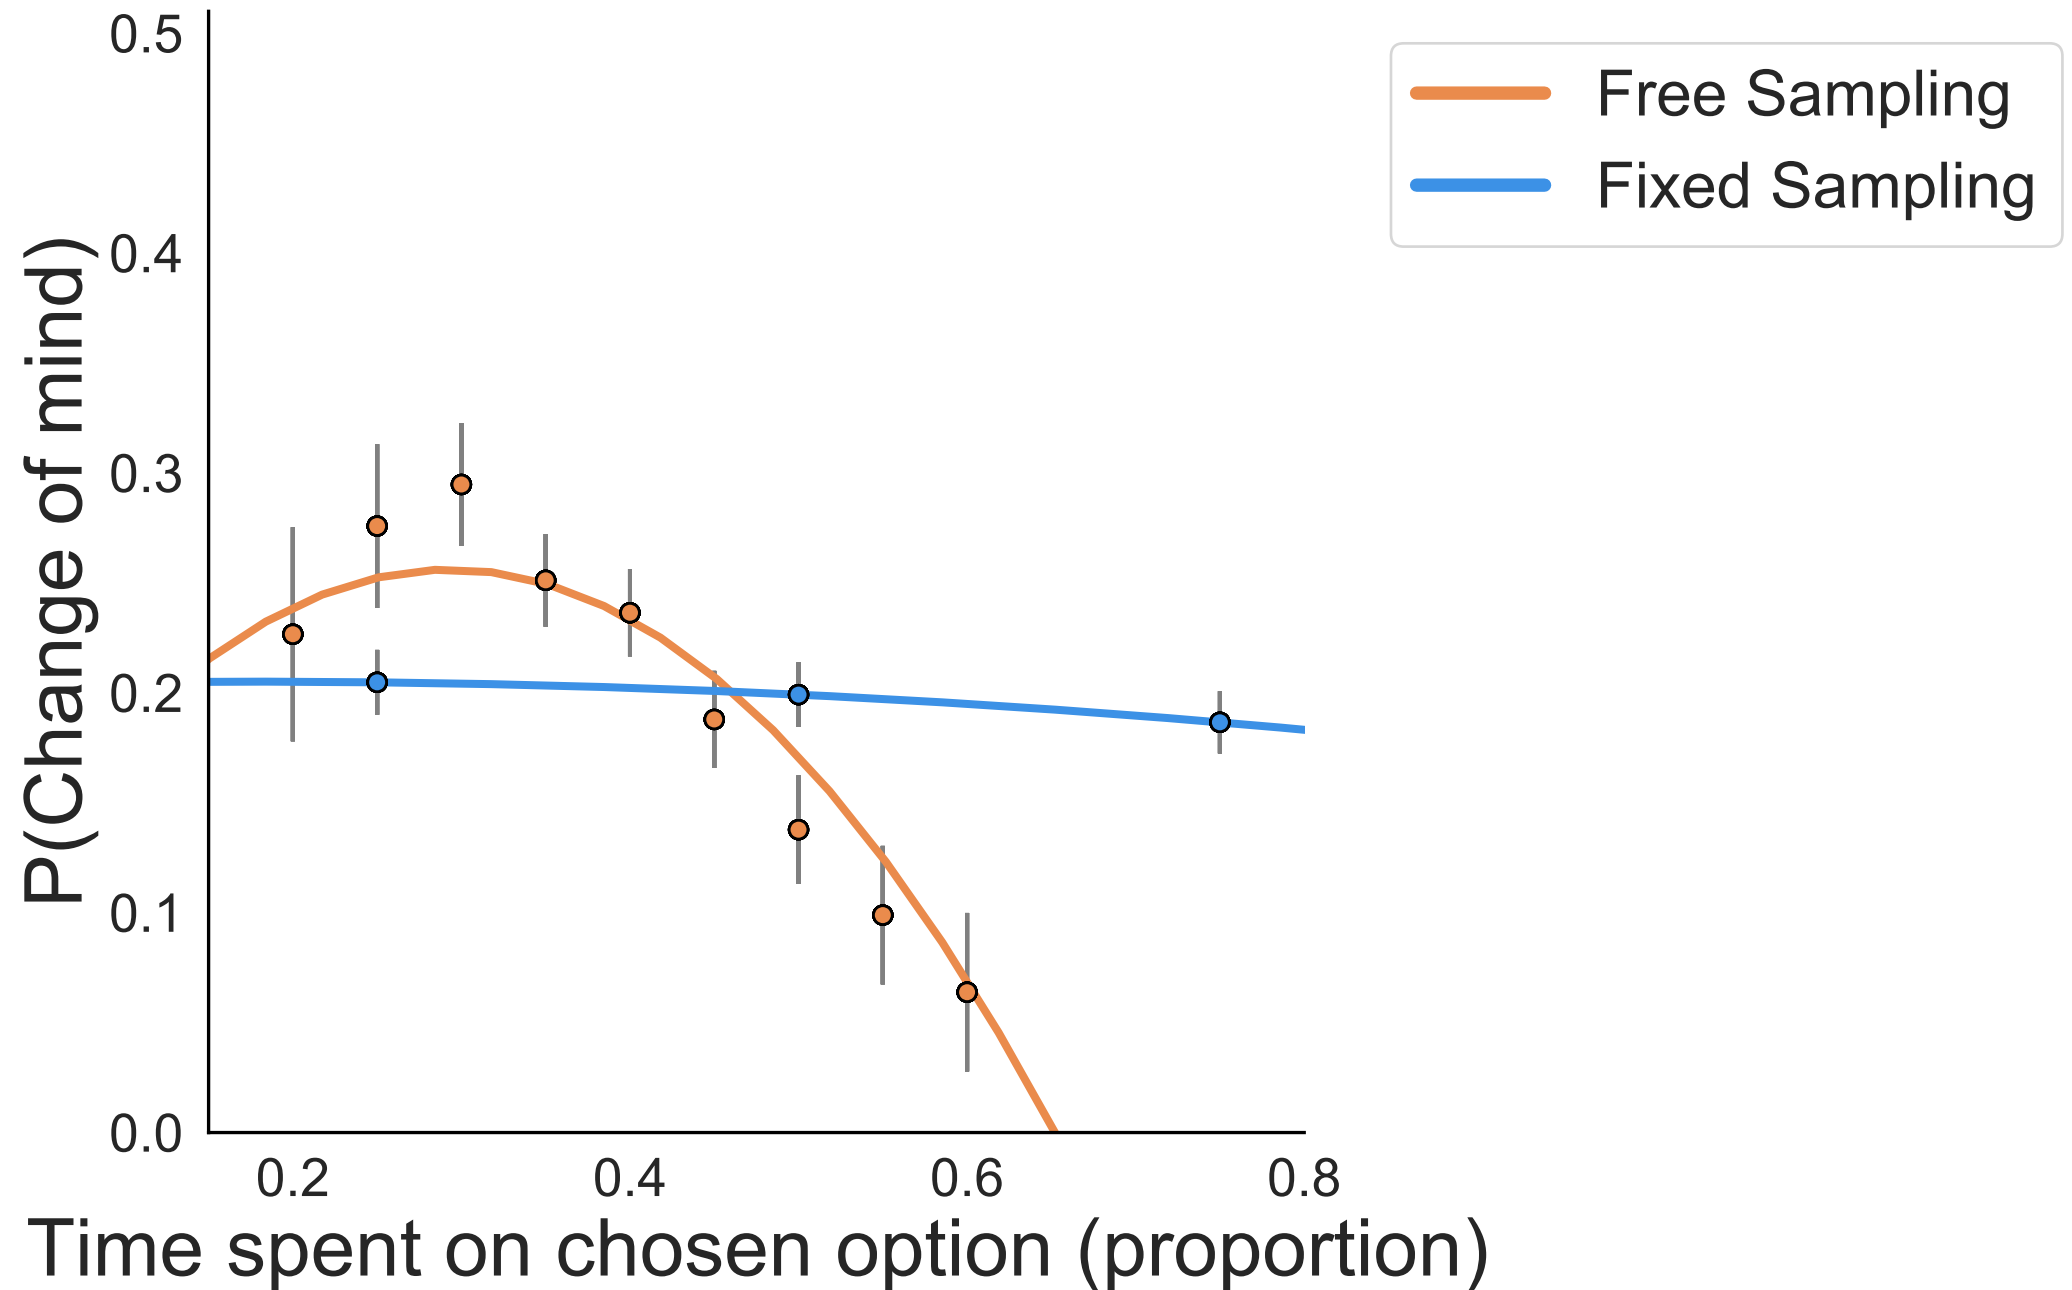

Supplement: supp [file elife-71768-supp-v1.zip › elife_poa_e71768_Figure_4_figure_supplement_2.pdf]

# Sampling Time Difference

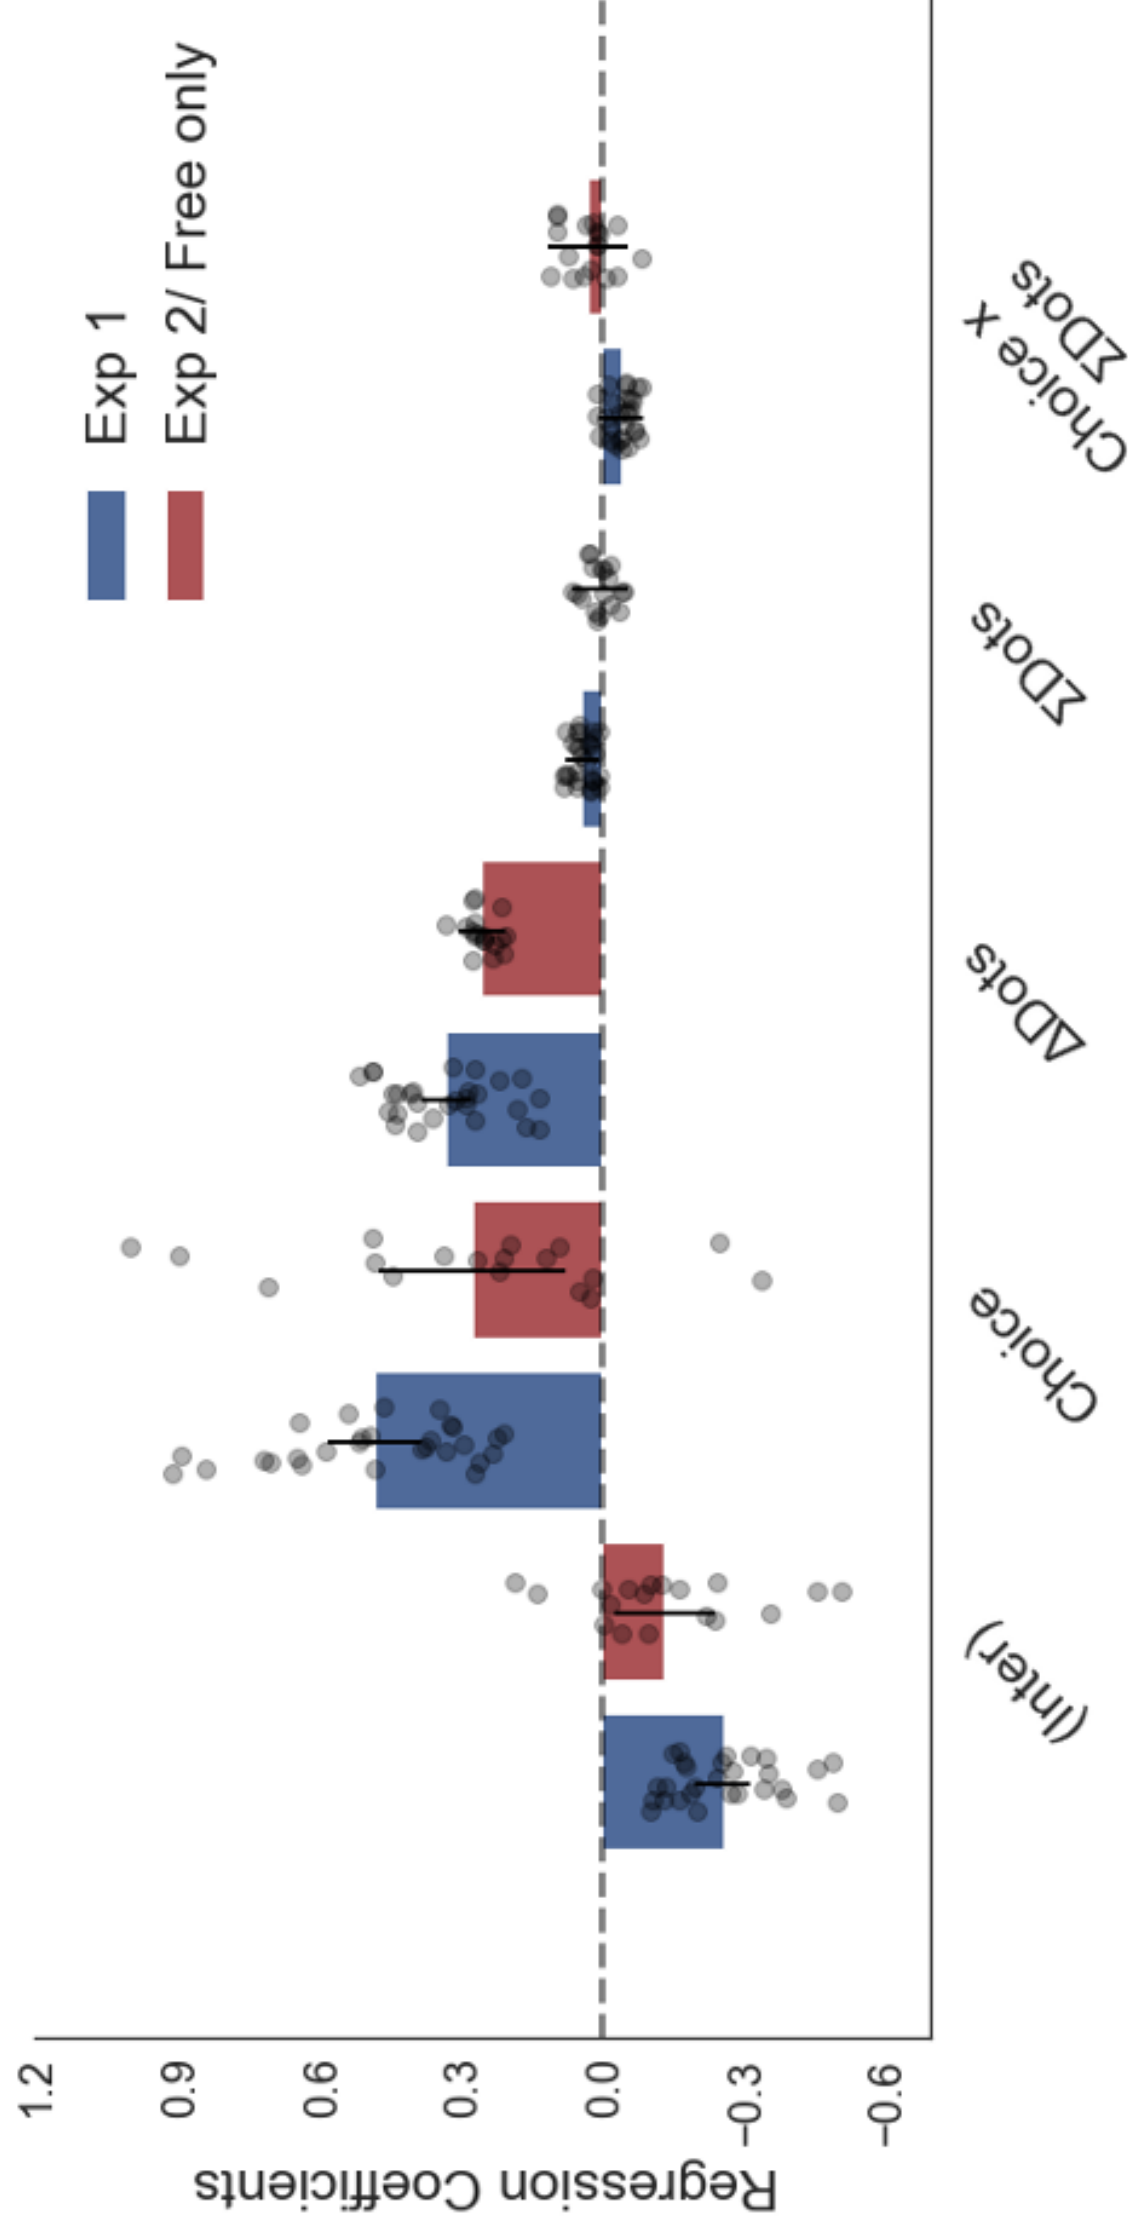

Supplement: supp [file elife-71768-supp-v1.zip › elife_poa_e71768_Figure_4_figure_supplement_3.pdf]

## Sampling Time Difference

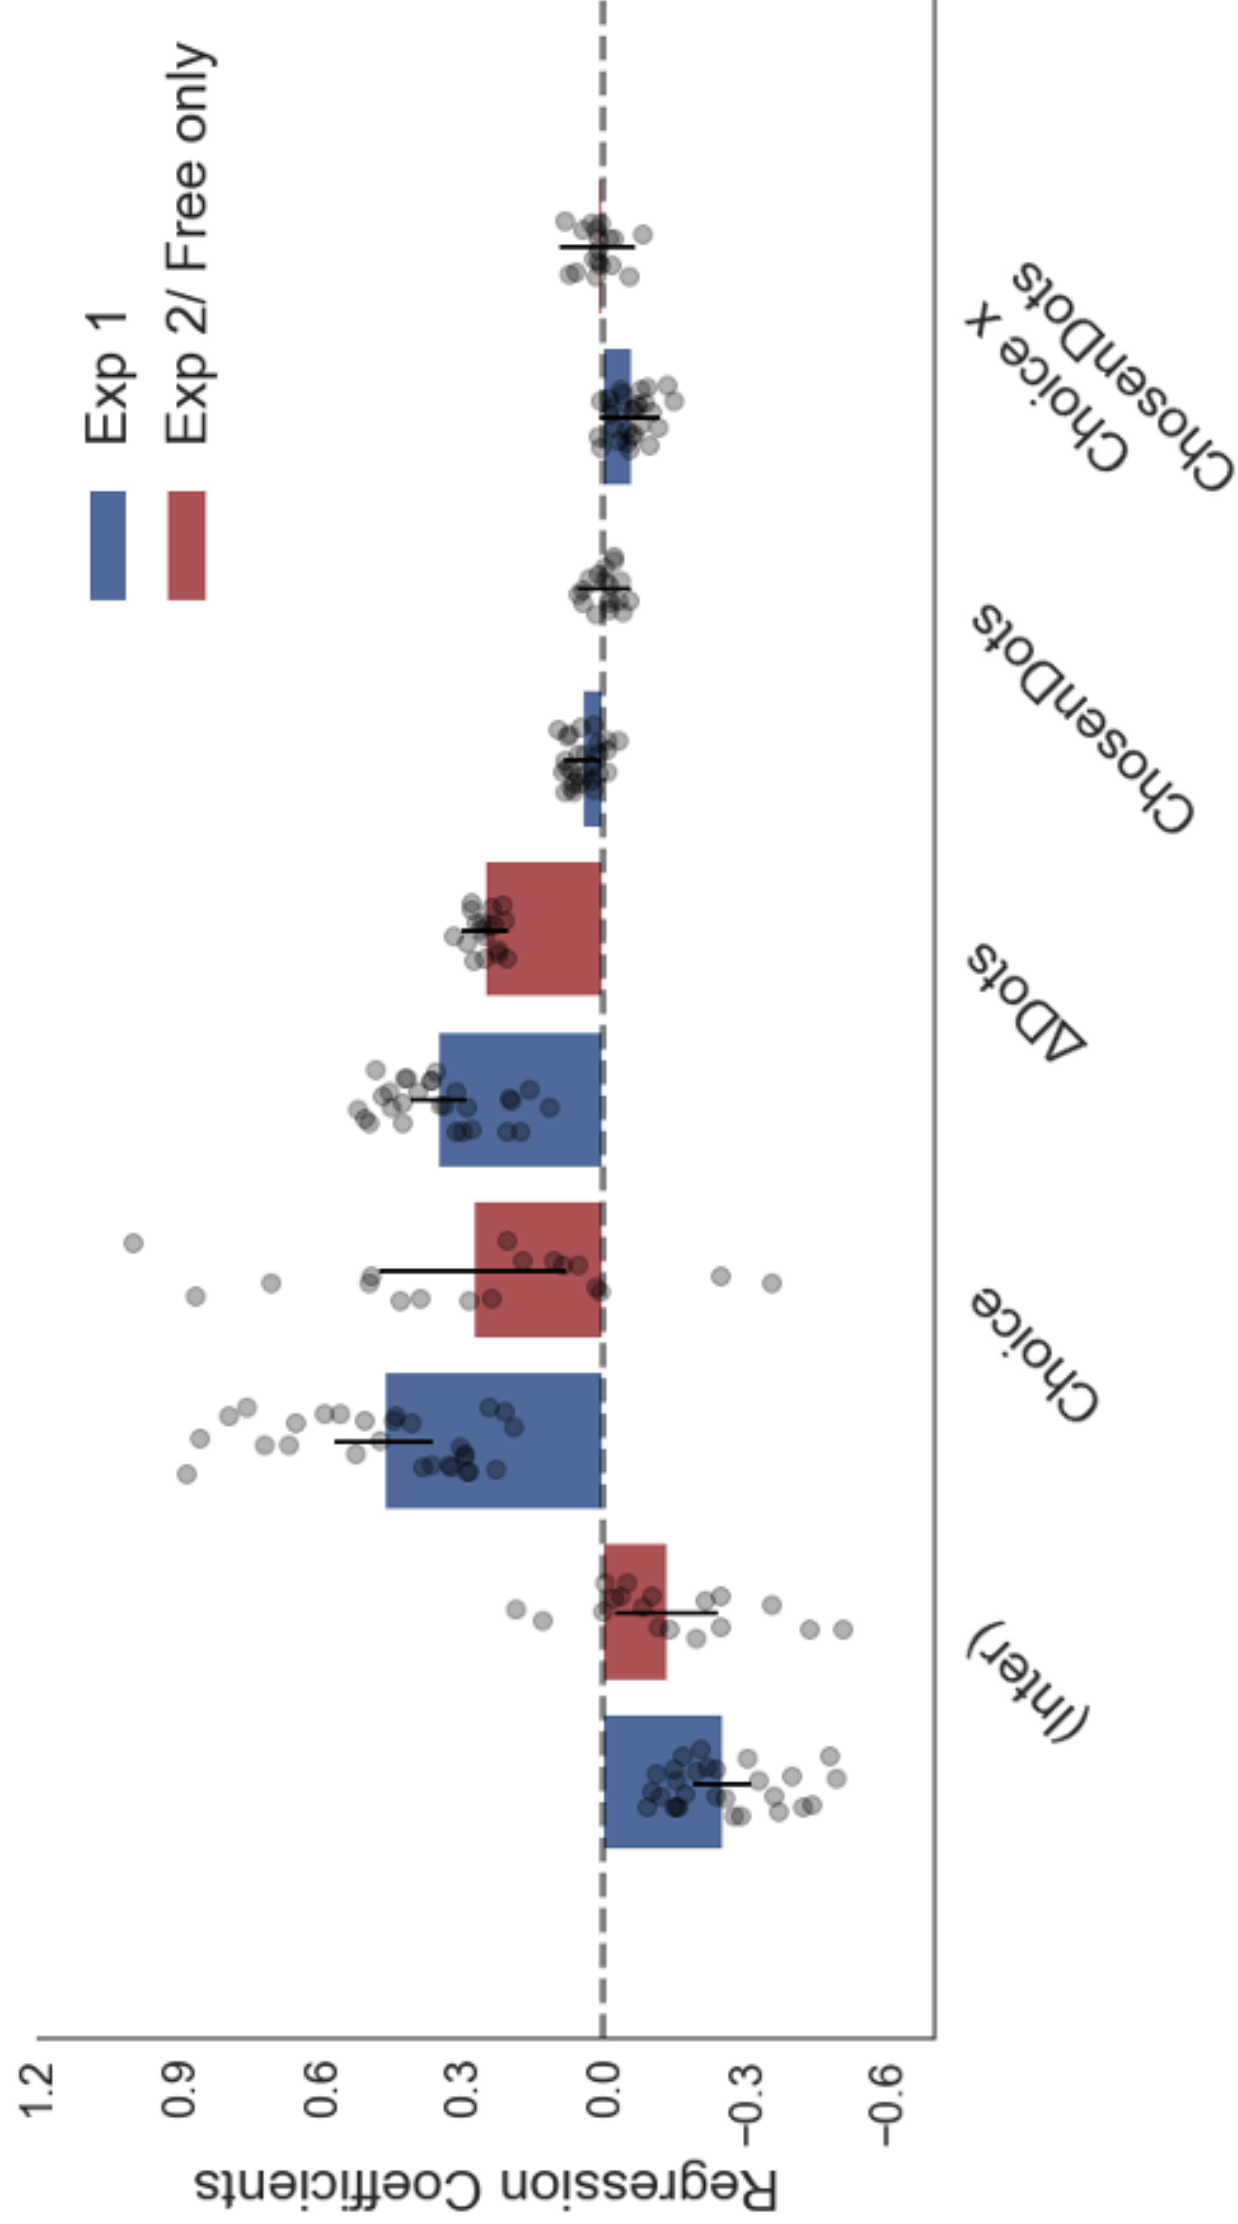

Supplement: supp [file elife-71768-supp-v1.zip › elife_poa_e71768_Figure_4_figure_supplement_4.pdf]

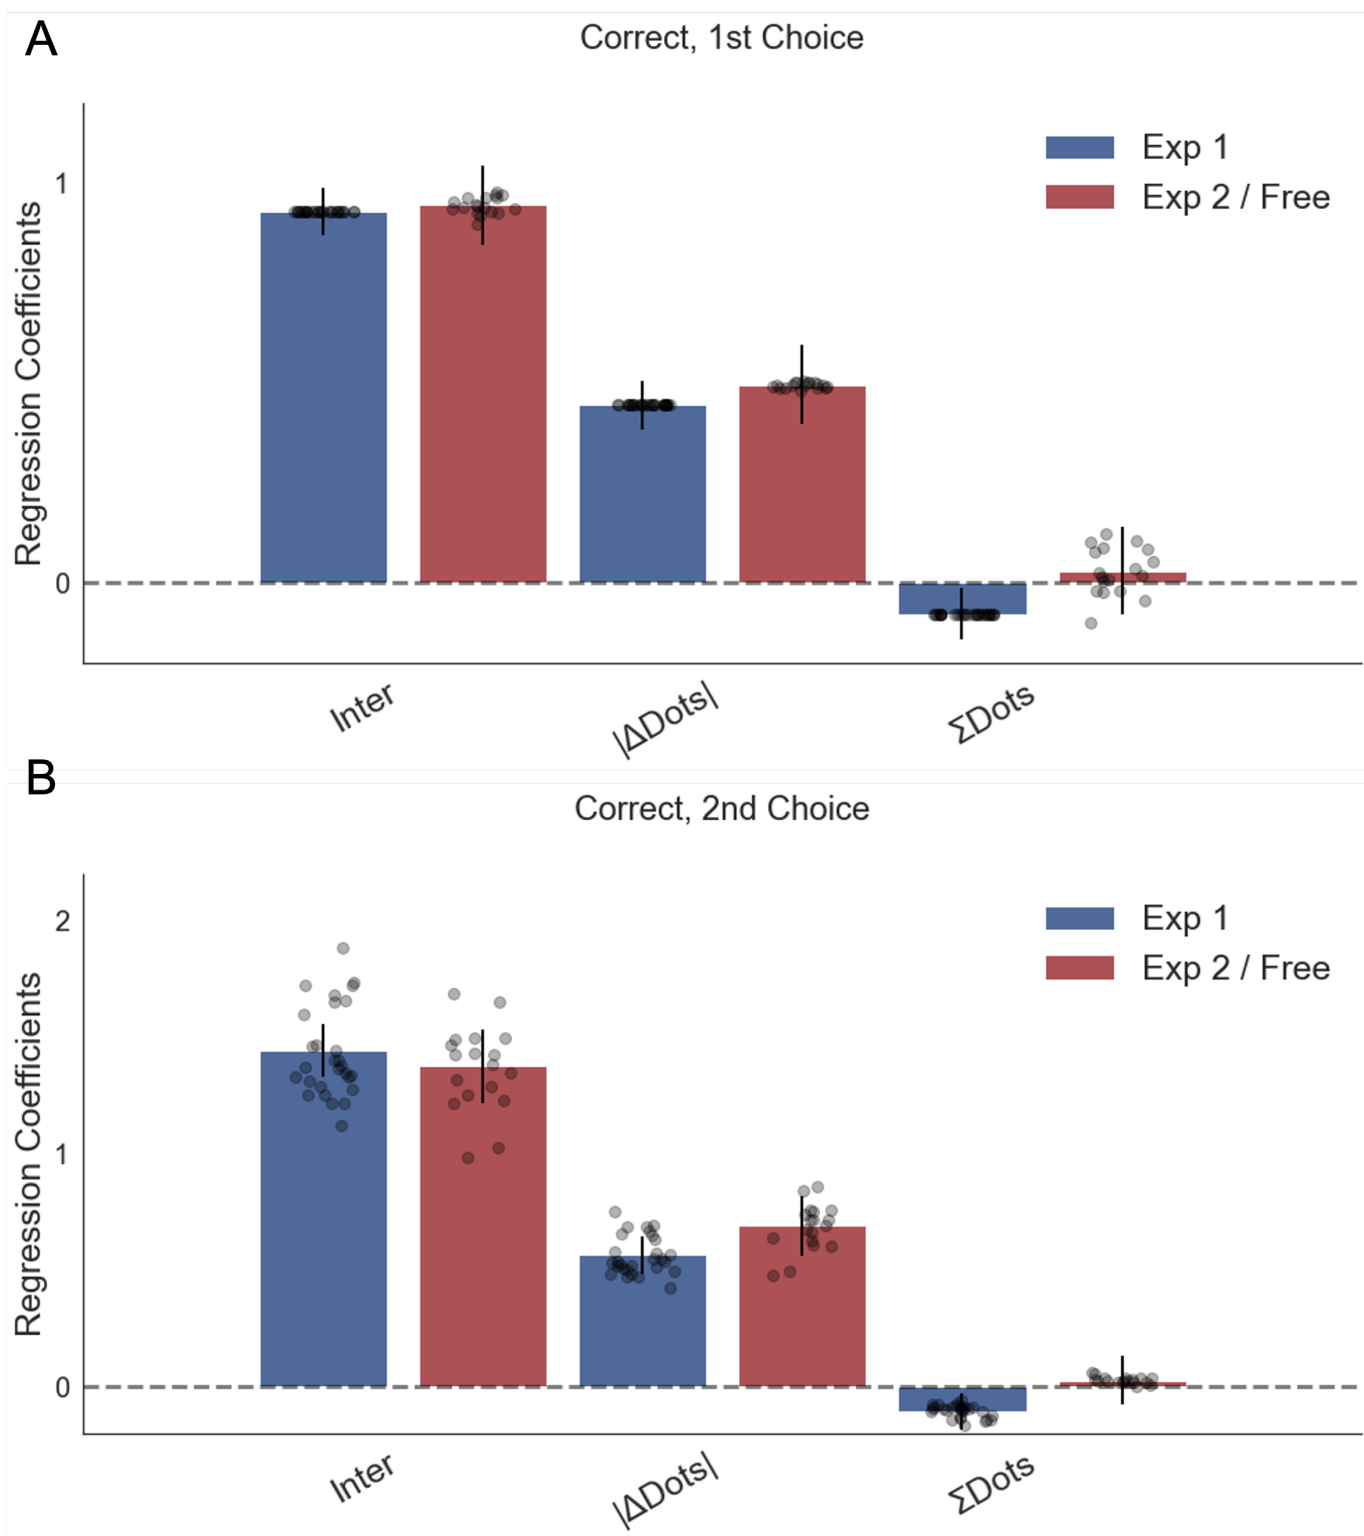

Supplement: supp [file elife-71768-supp-v1.zip › elife_poa_e71768_Figure_4_figure_supplement_5.pdf]

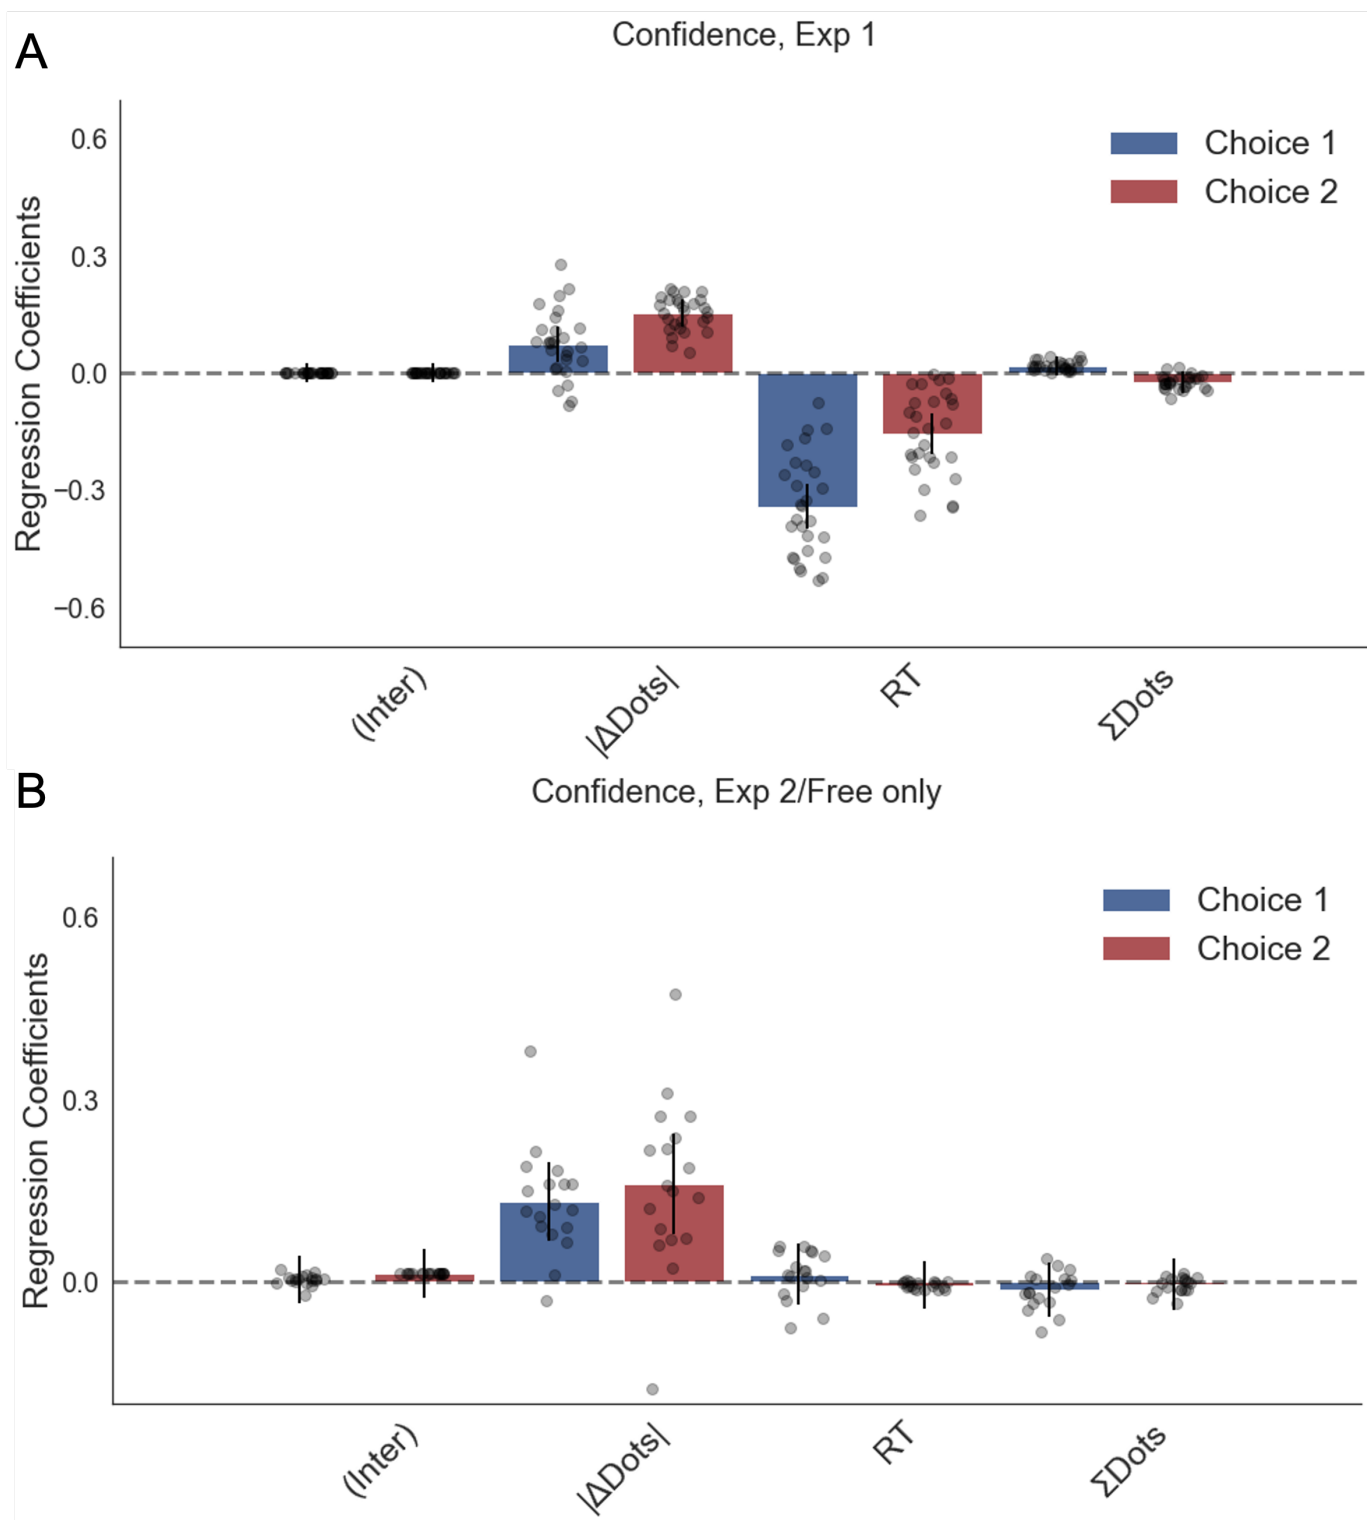

Supplement: supp [file elife-71768-supp-v1.zip › elife_poa_e71768_Figure_4_figure_supplement_6.pdf]

Confidence change (2nd - 1st)

0.3

Exp 1

Exp 2/Free

Regression Coefficients

0.0

-0.3

(Inter)

/ΔDots/

2Dots

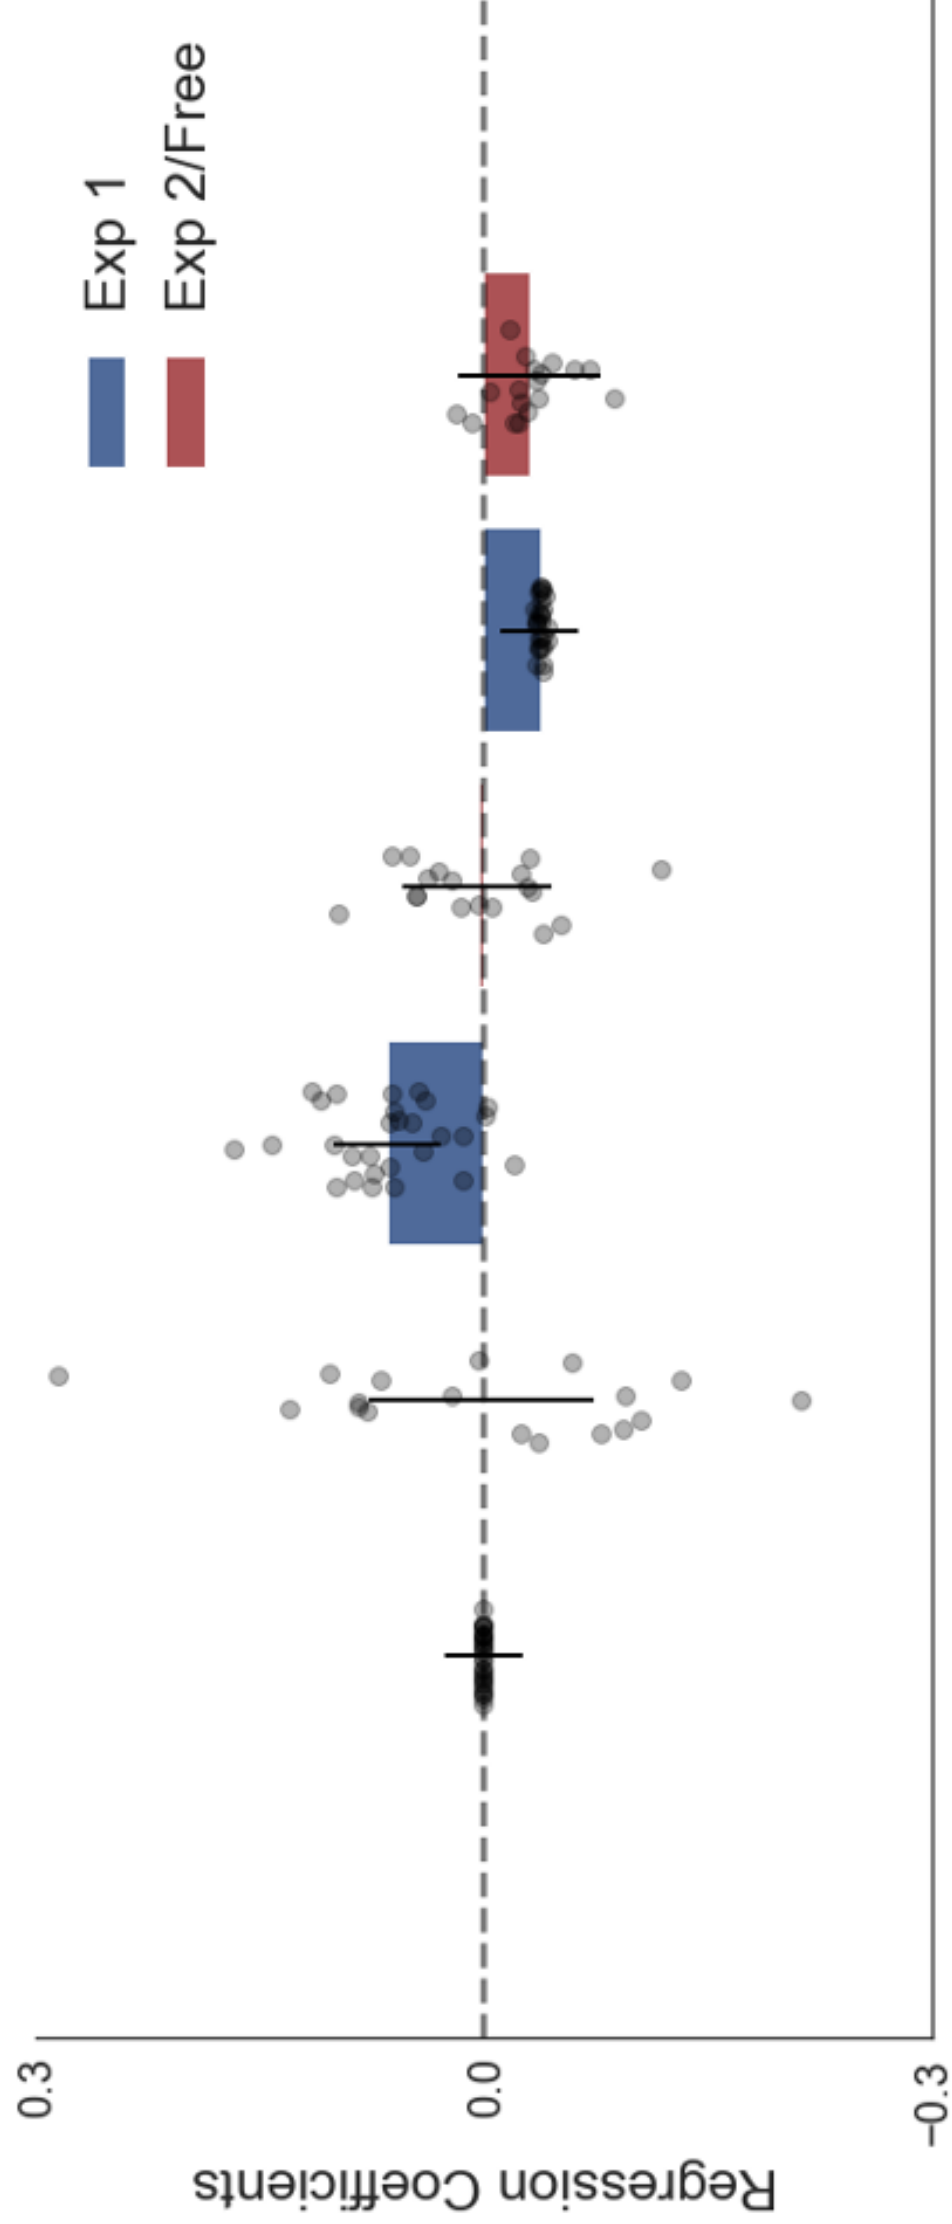

Supplement: supp [file elife-71768-supp-v1.zip › elife_poa_e71768_Figure_4_figure_supplement_7.pdf]

# Sampling Time Difference

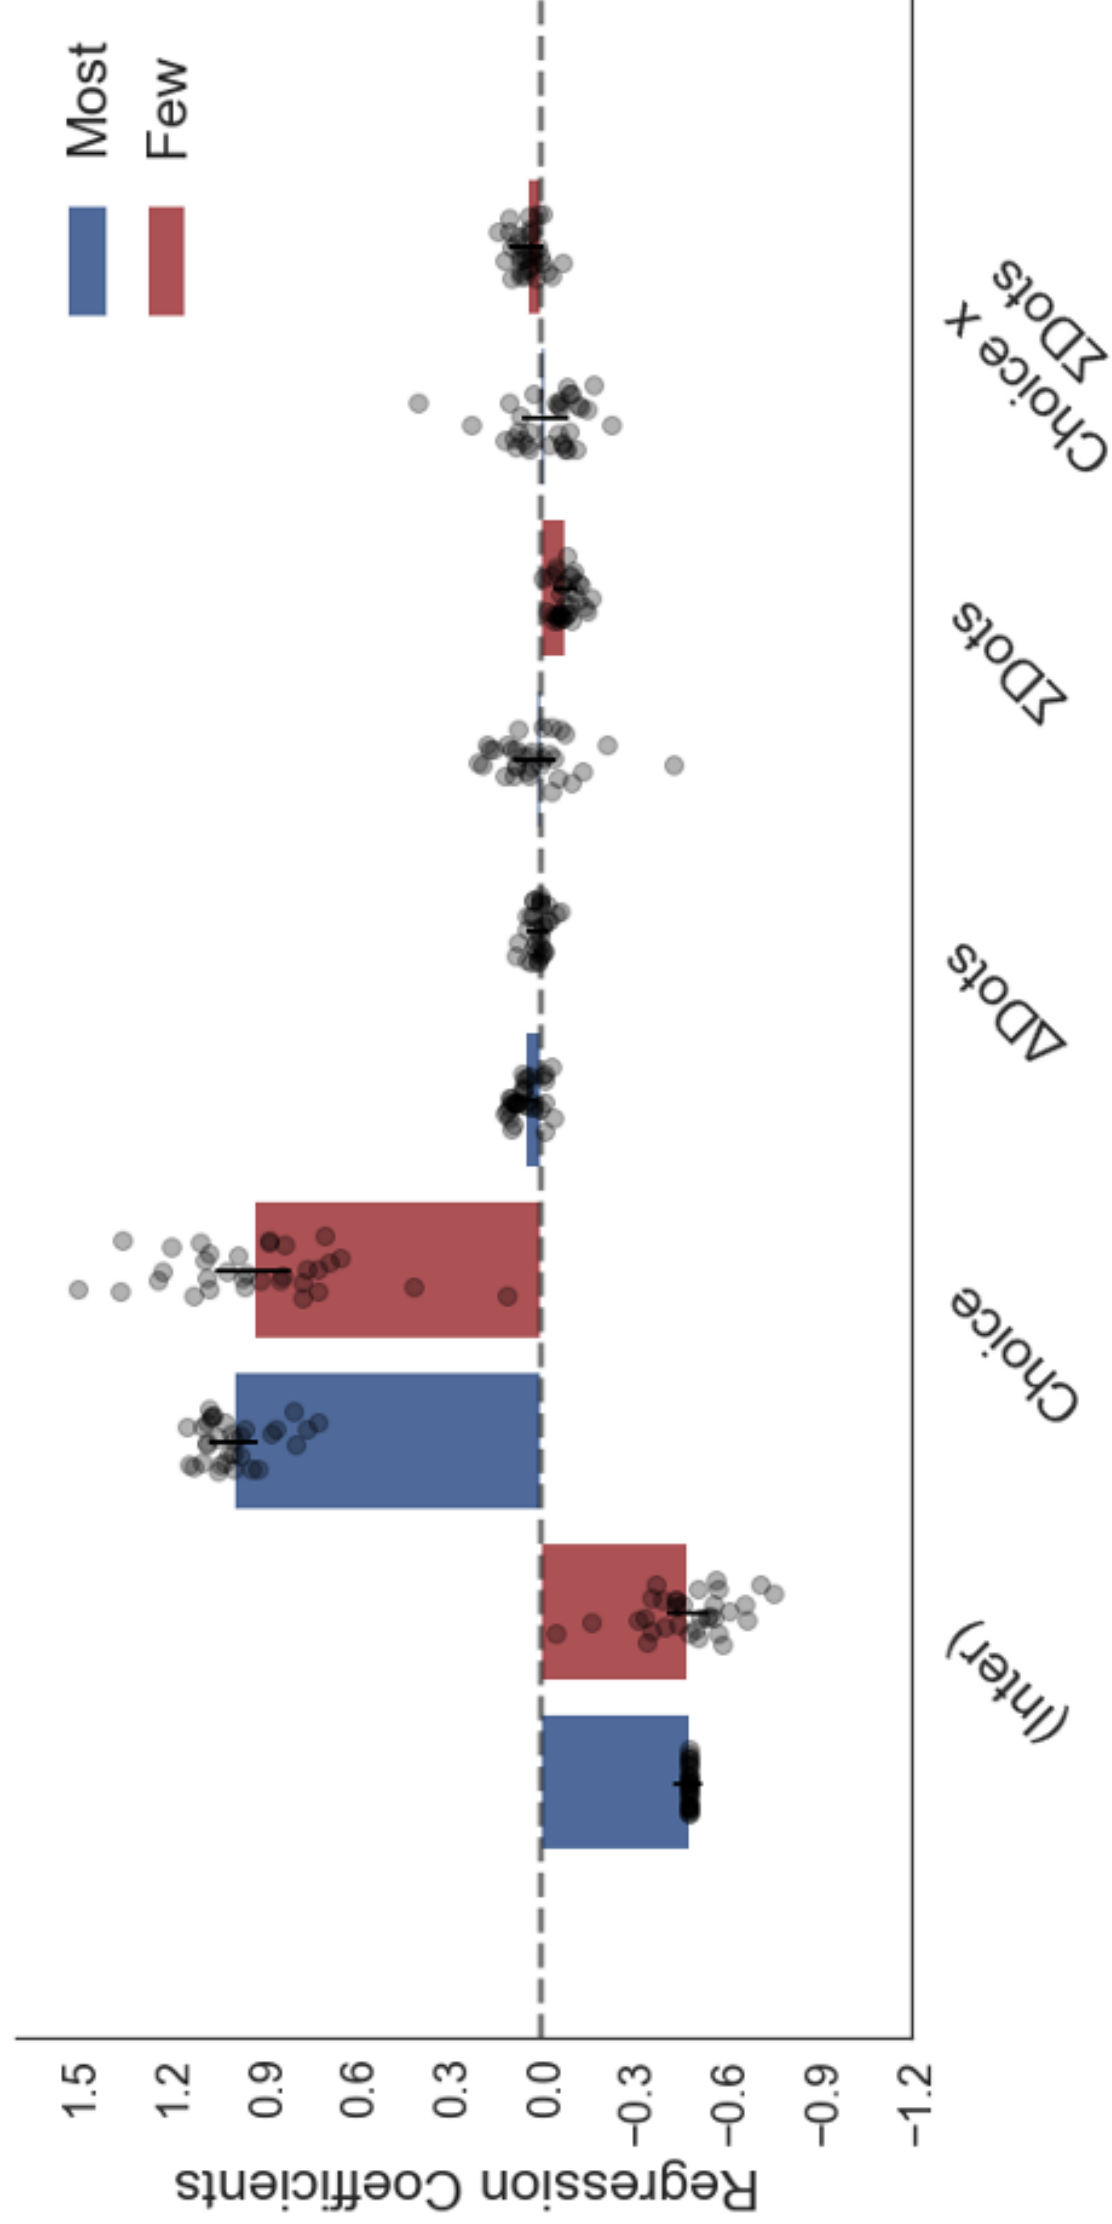

Supplement: supp [file elife-71768-supp-v1.zip › elife_poa_e71768_Figure_4_figure_supplement_8.pdf]

# Sampling Time Difference

Coefficients

0.5

0.0

-0.5

Dot Difference

First Item

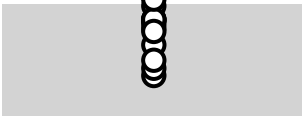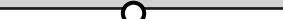

Supplement: supp [file elife-71768-supp-v1.zip › elife_poa_e71768_Figure_4_figure_supplement_9.pdf]

A

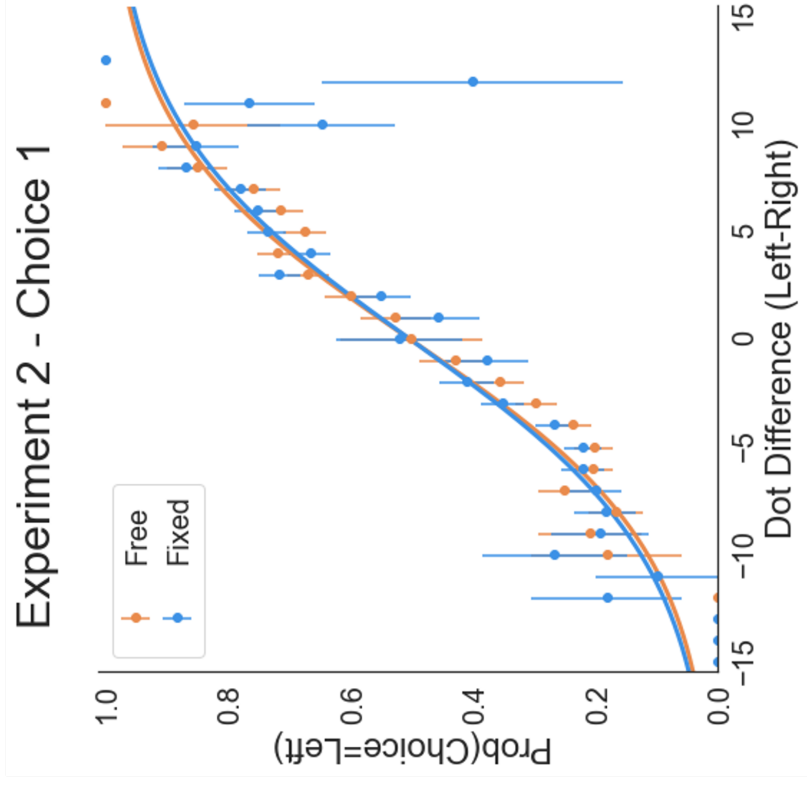

B

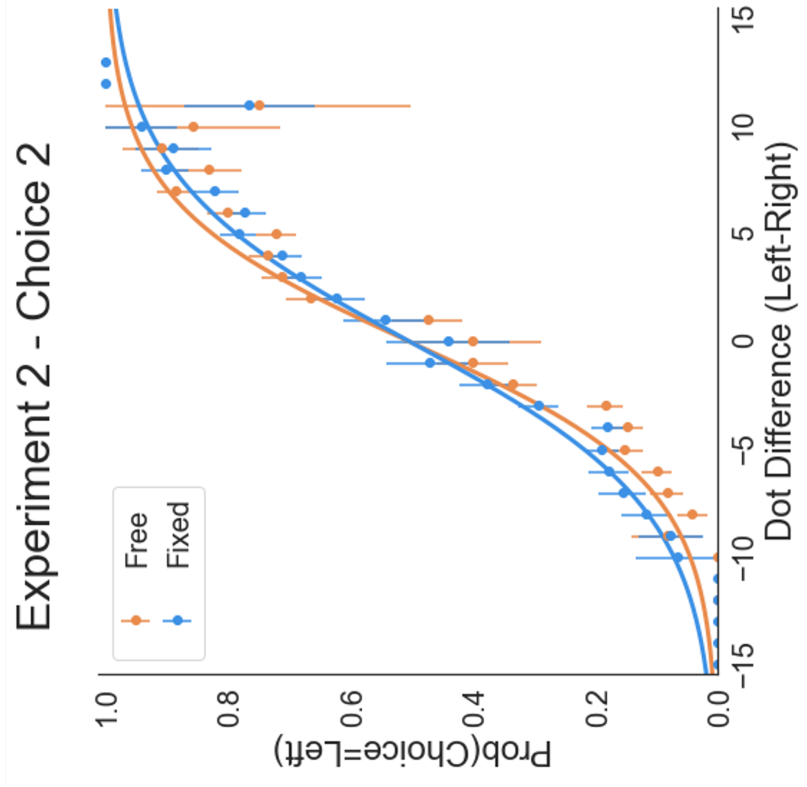

C

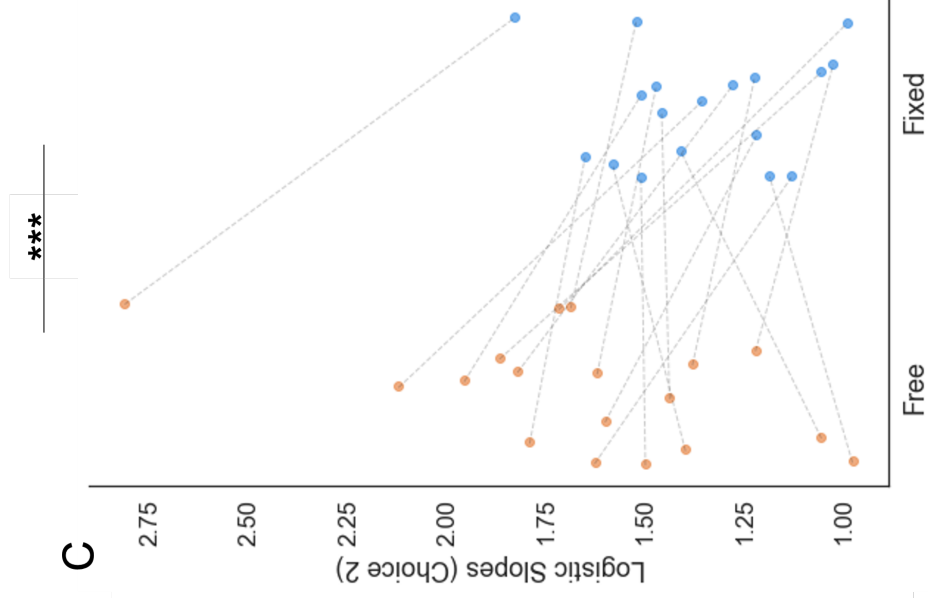

Supplement: supp [file elife-71768-supp-v1.zip › elife_poa_e71768_Figure_4_figure_supplement_10.pdf]

A

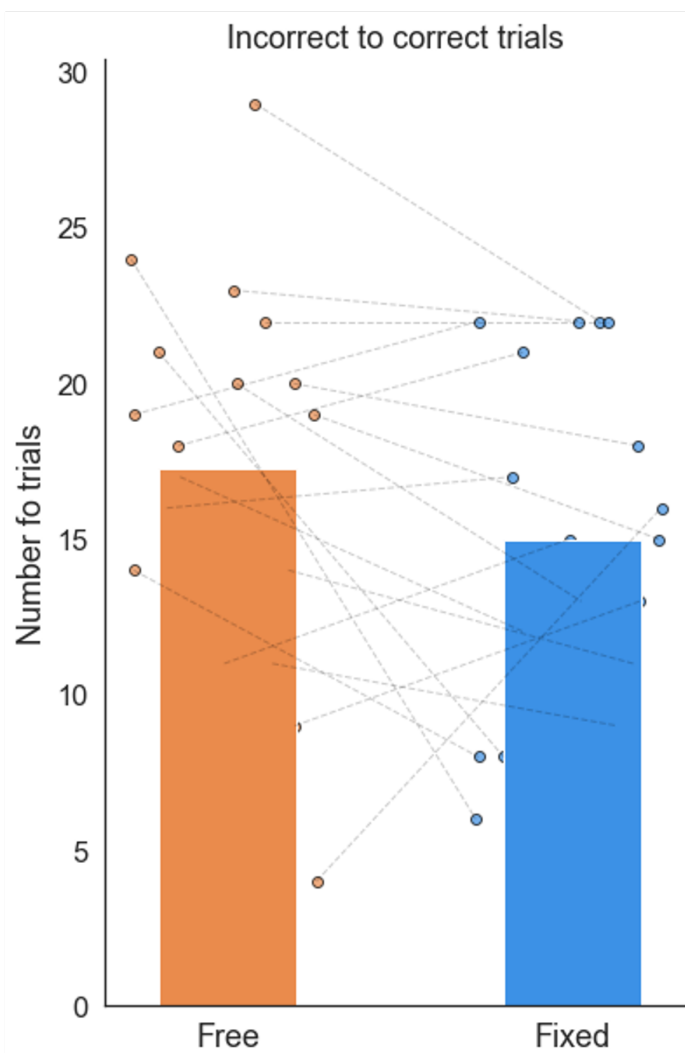

B

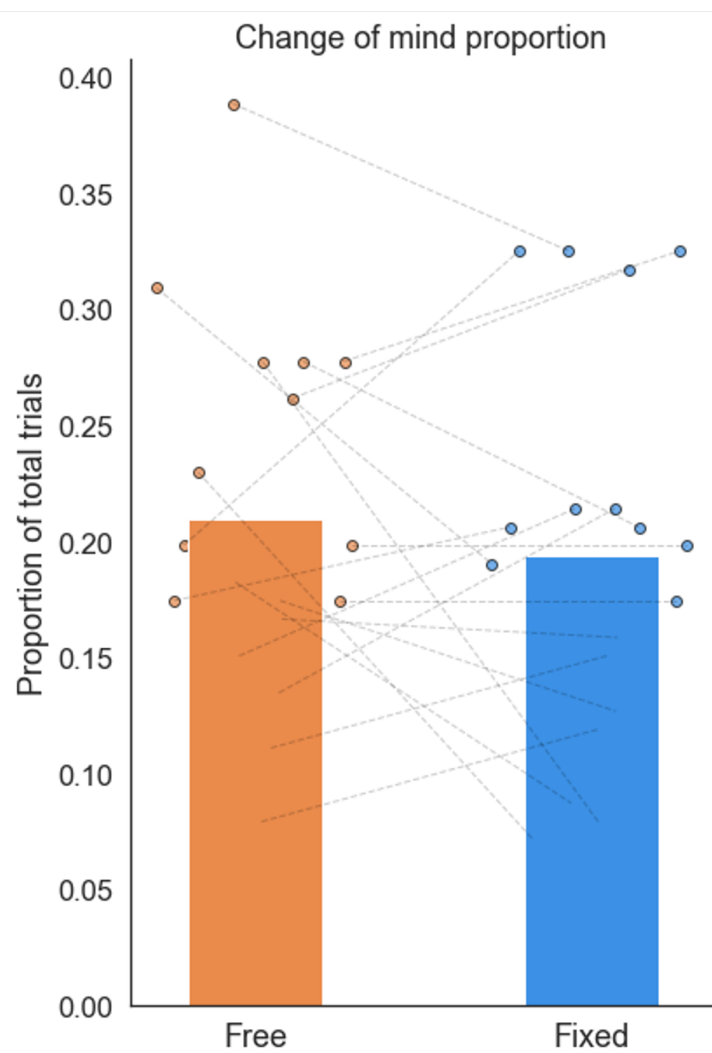

Supplement: supp [file elife-71768-supp-v1.zip › elife_poa_e71768_Figure_4_figure_supplement_11.pdf]

**A**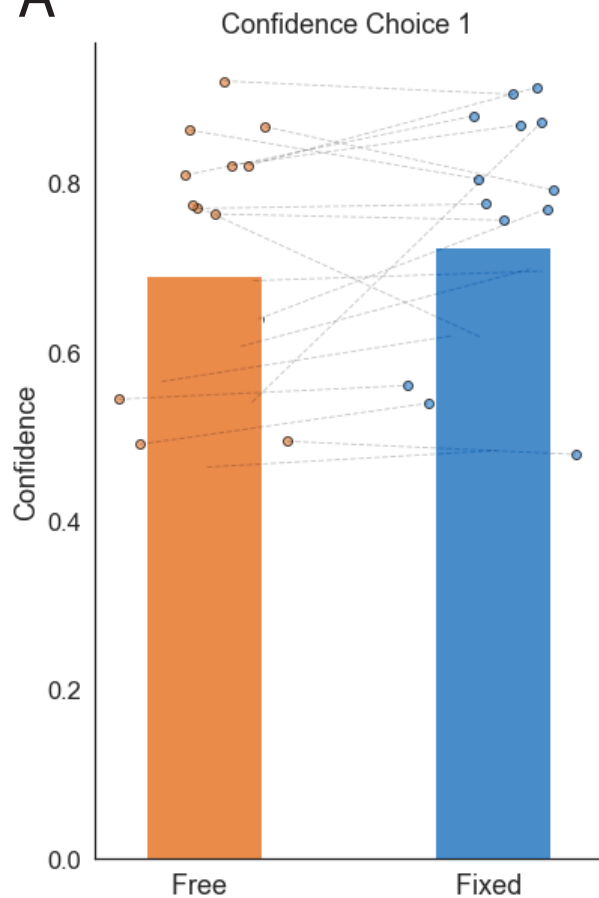**B**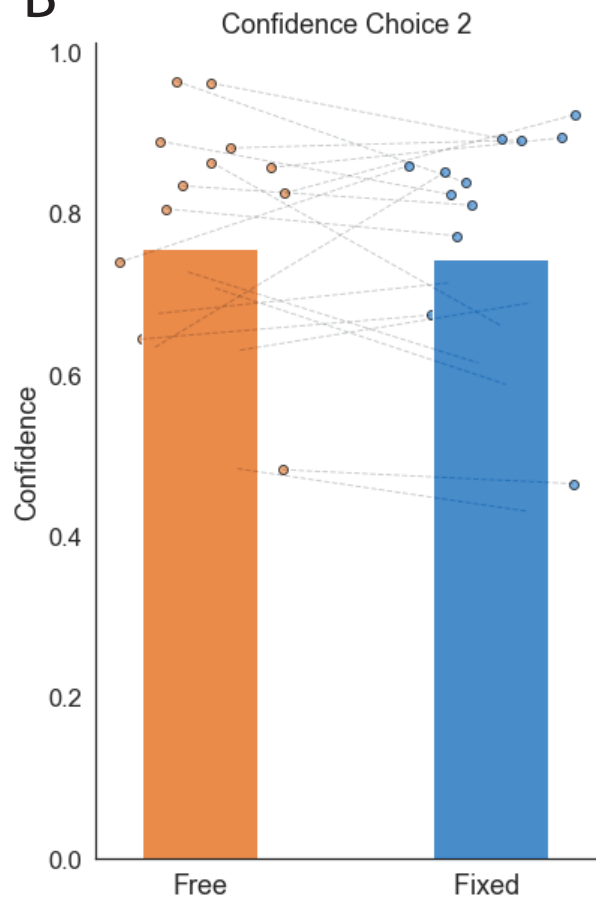

Supplement: supp [file elife-71768-supp-v1.zip › elife_poa_e71768_Figure_4_figure_supplement_12.pdf]

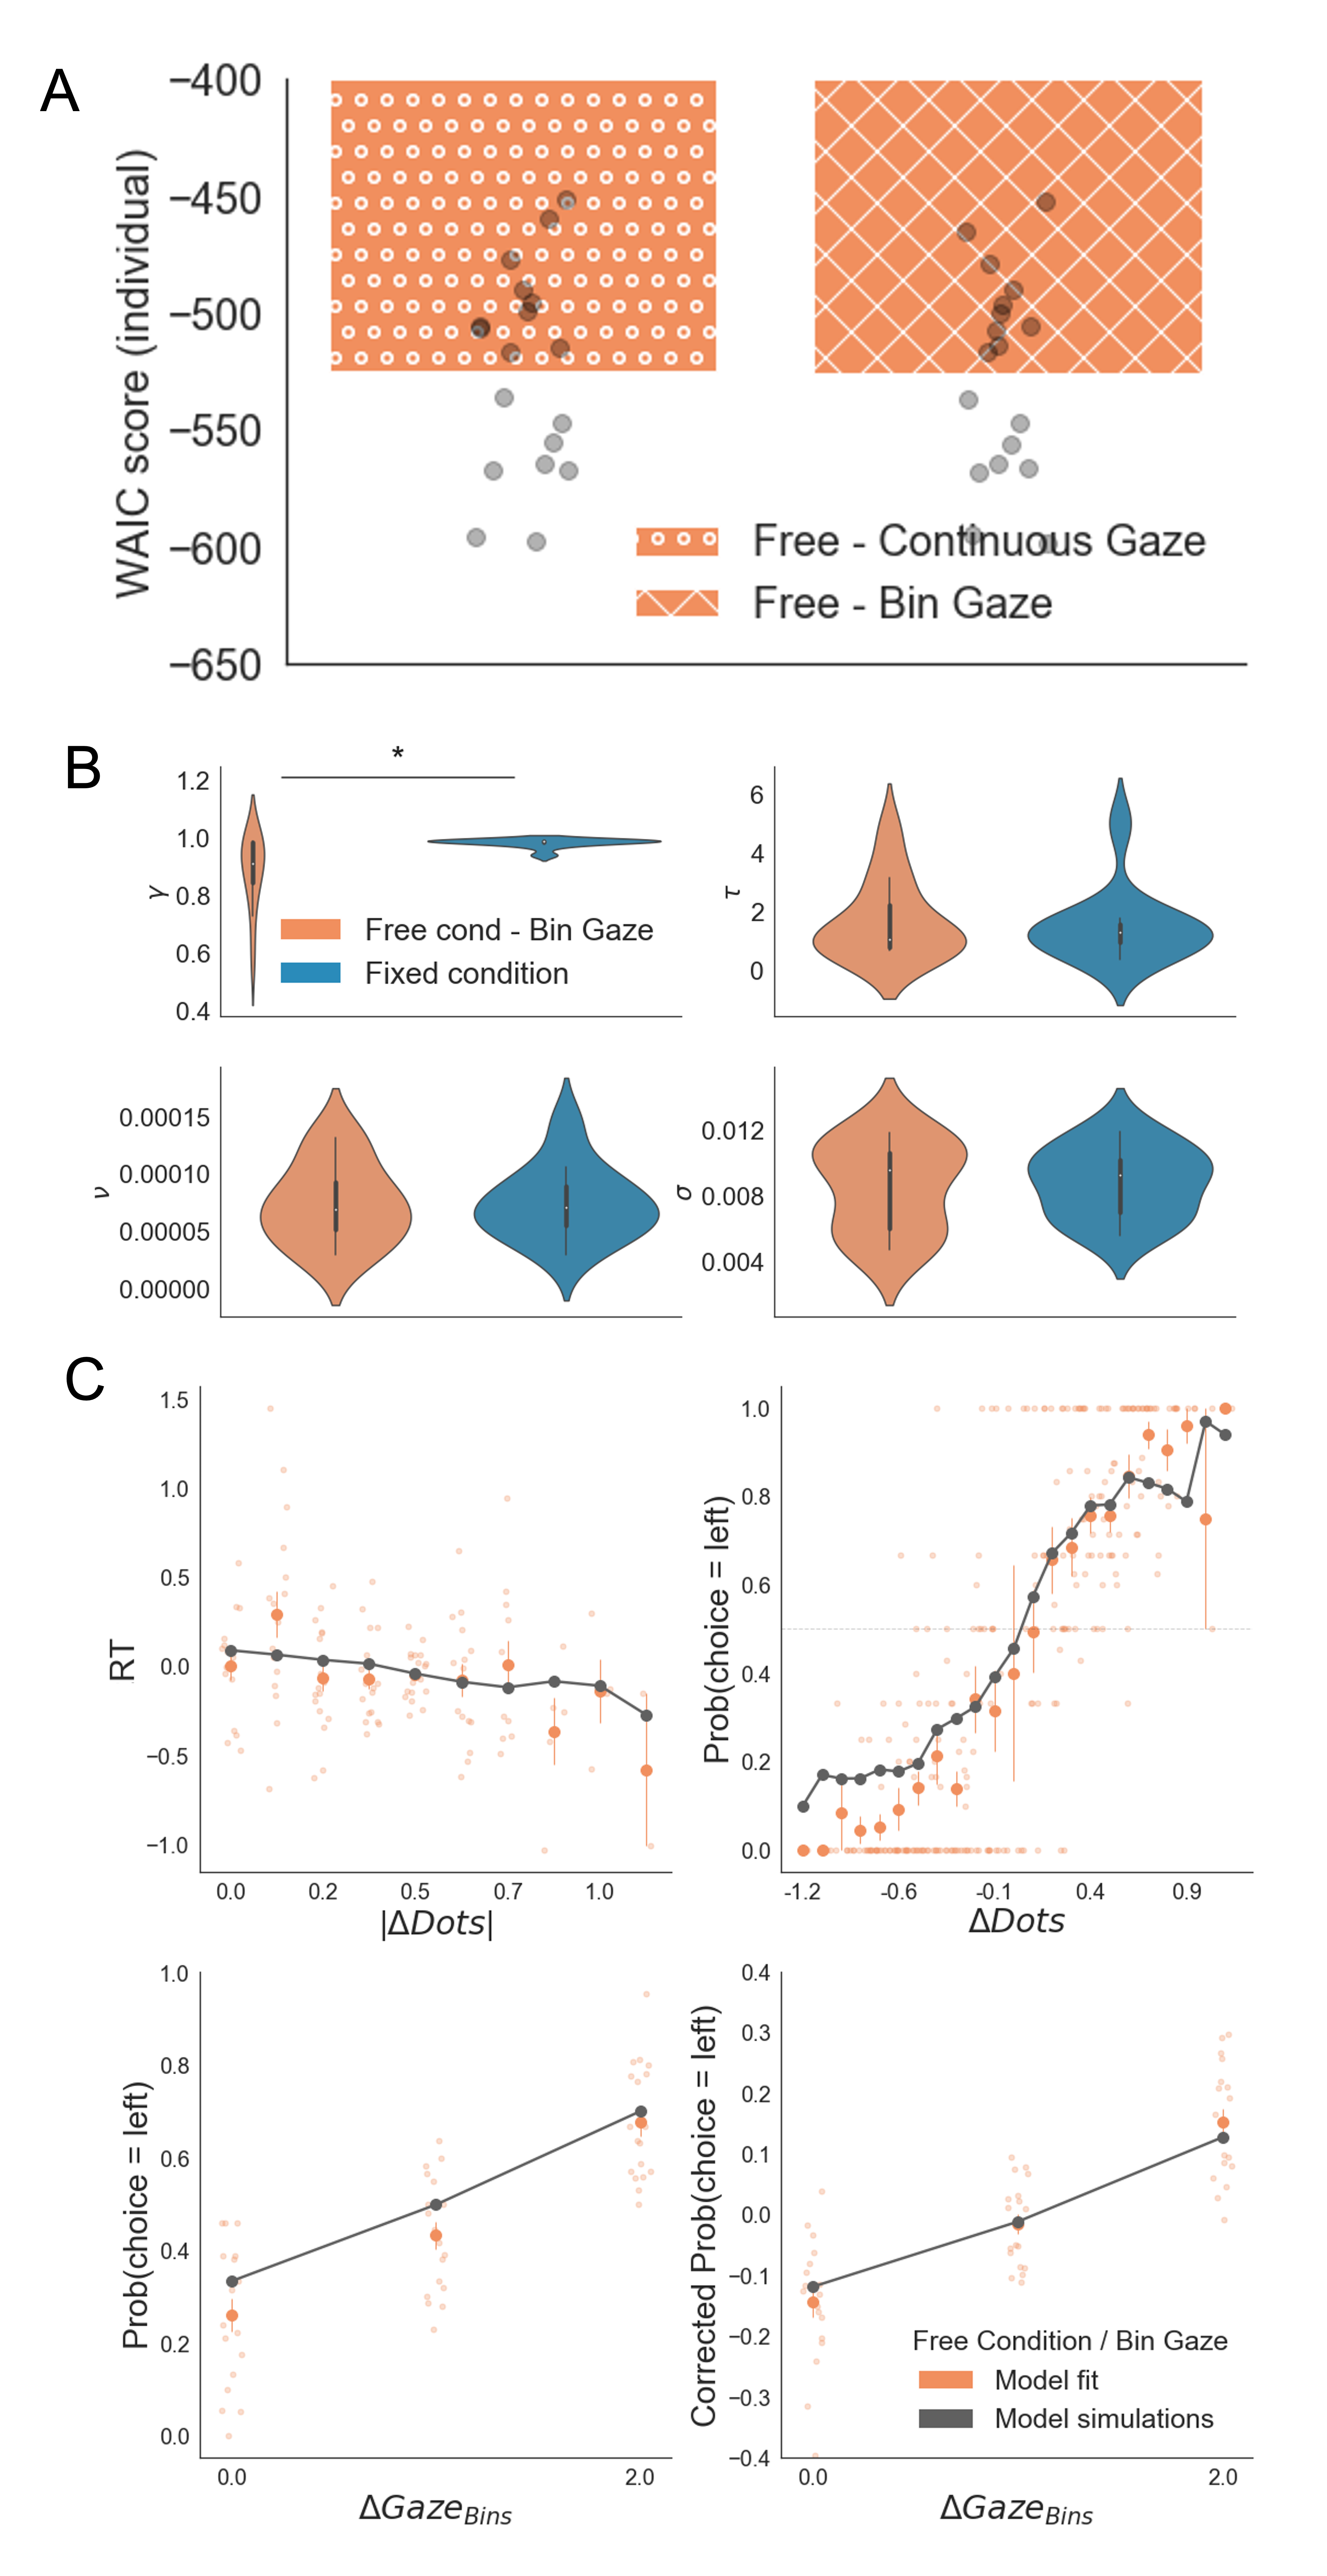

Supplement: supp [file elife-71768-supp-v1.zip › elife_poa_e71768_Figure_5_figure_supplement_1.png]

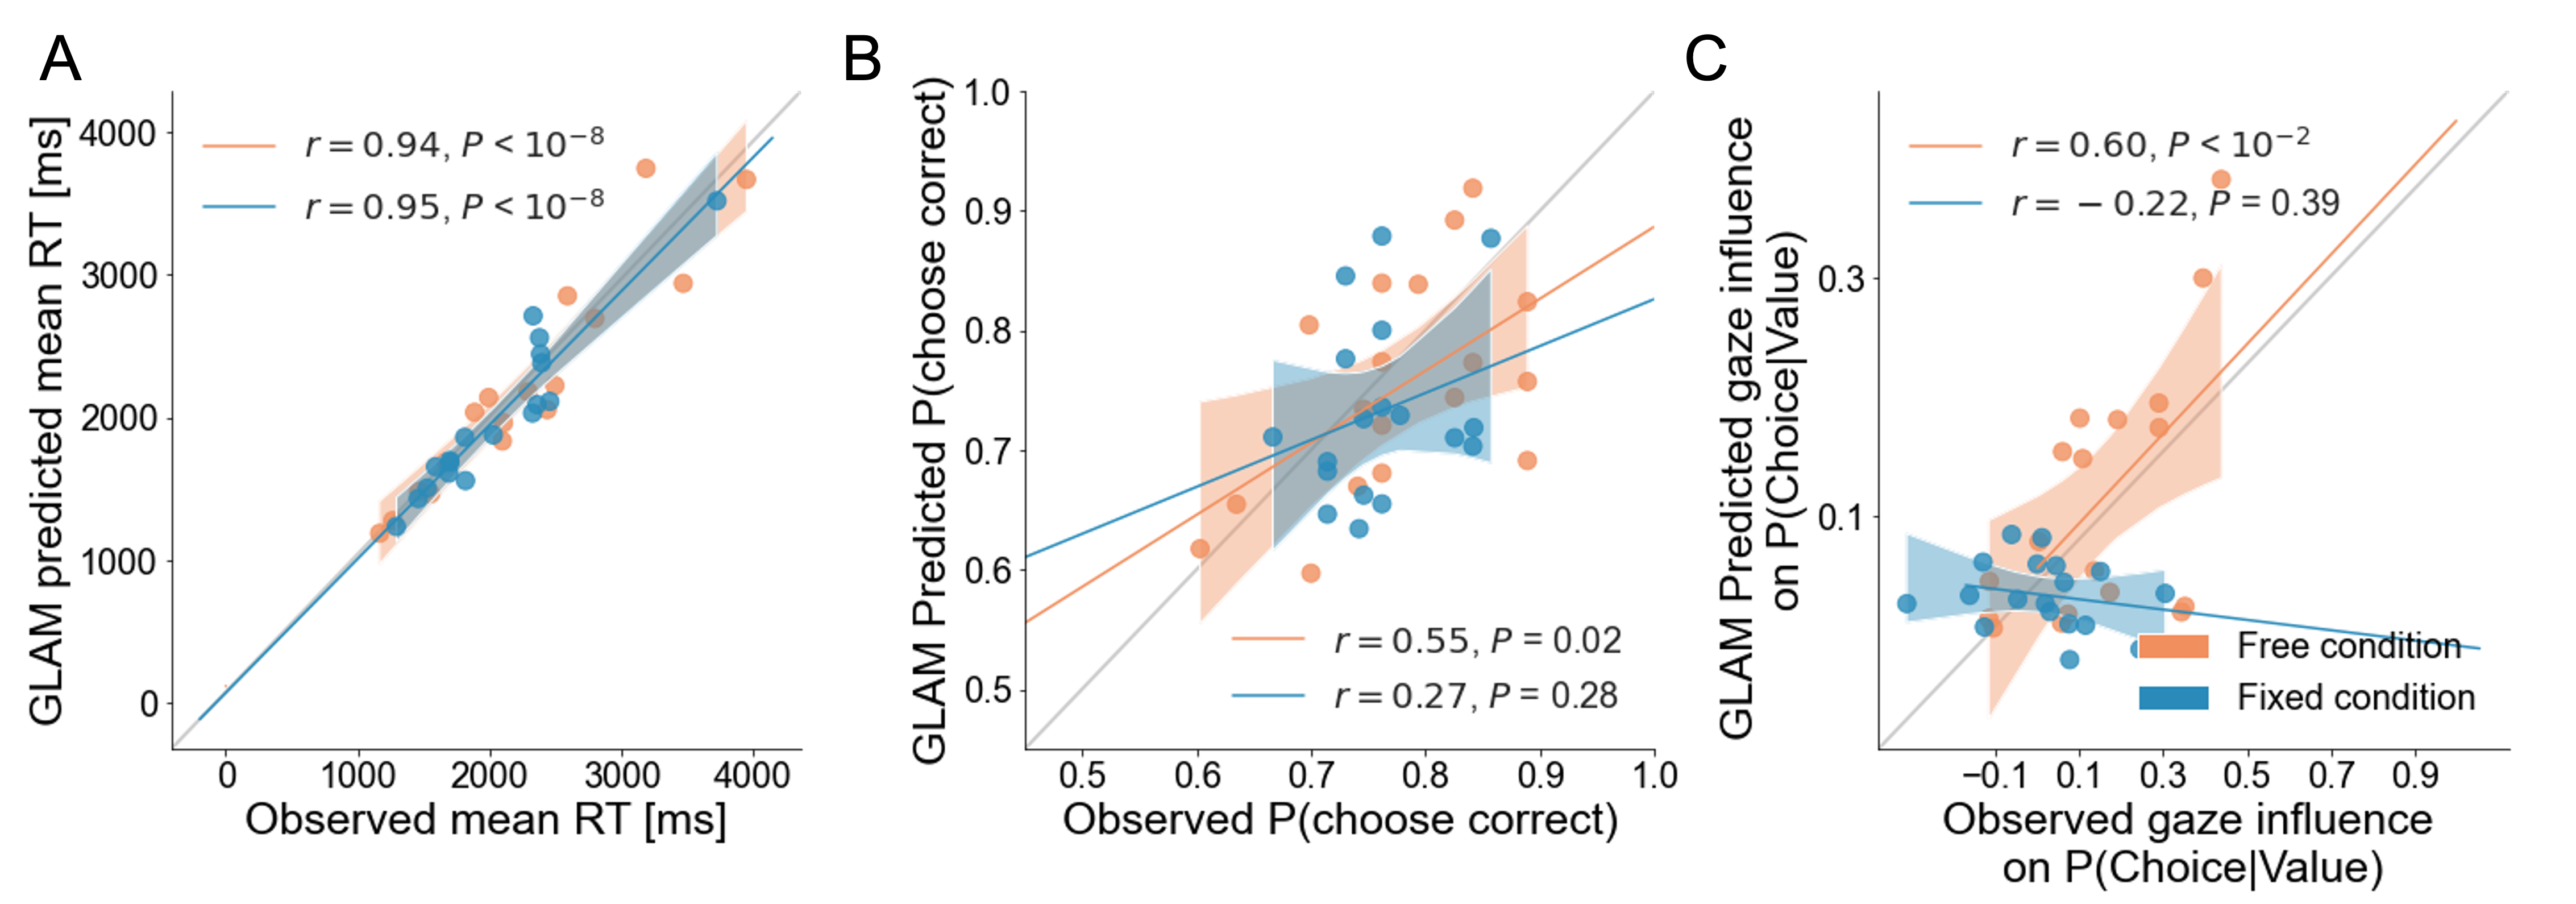

Supplement: supp [file elife-71768-supp-v1.zip › elife_poa_e71768_Figure_5_figure_supplement_2.png]

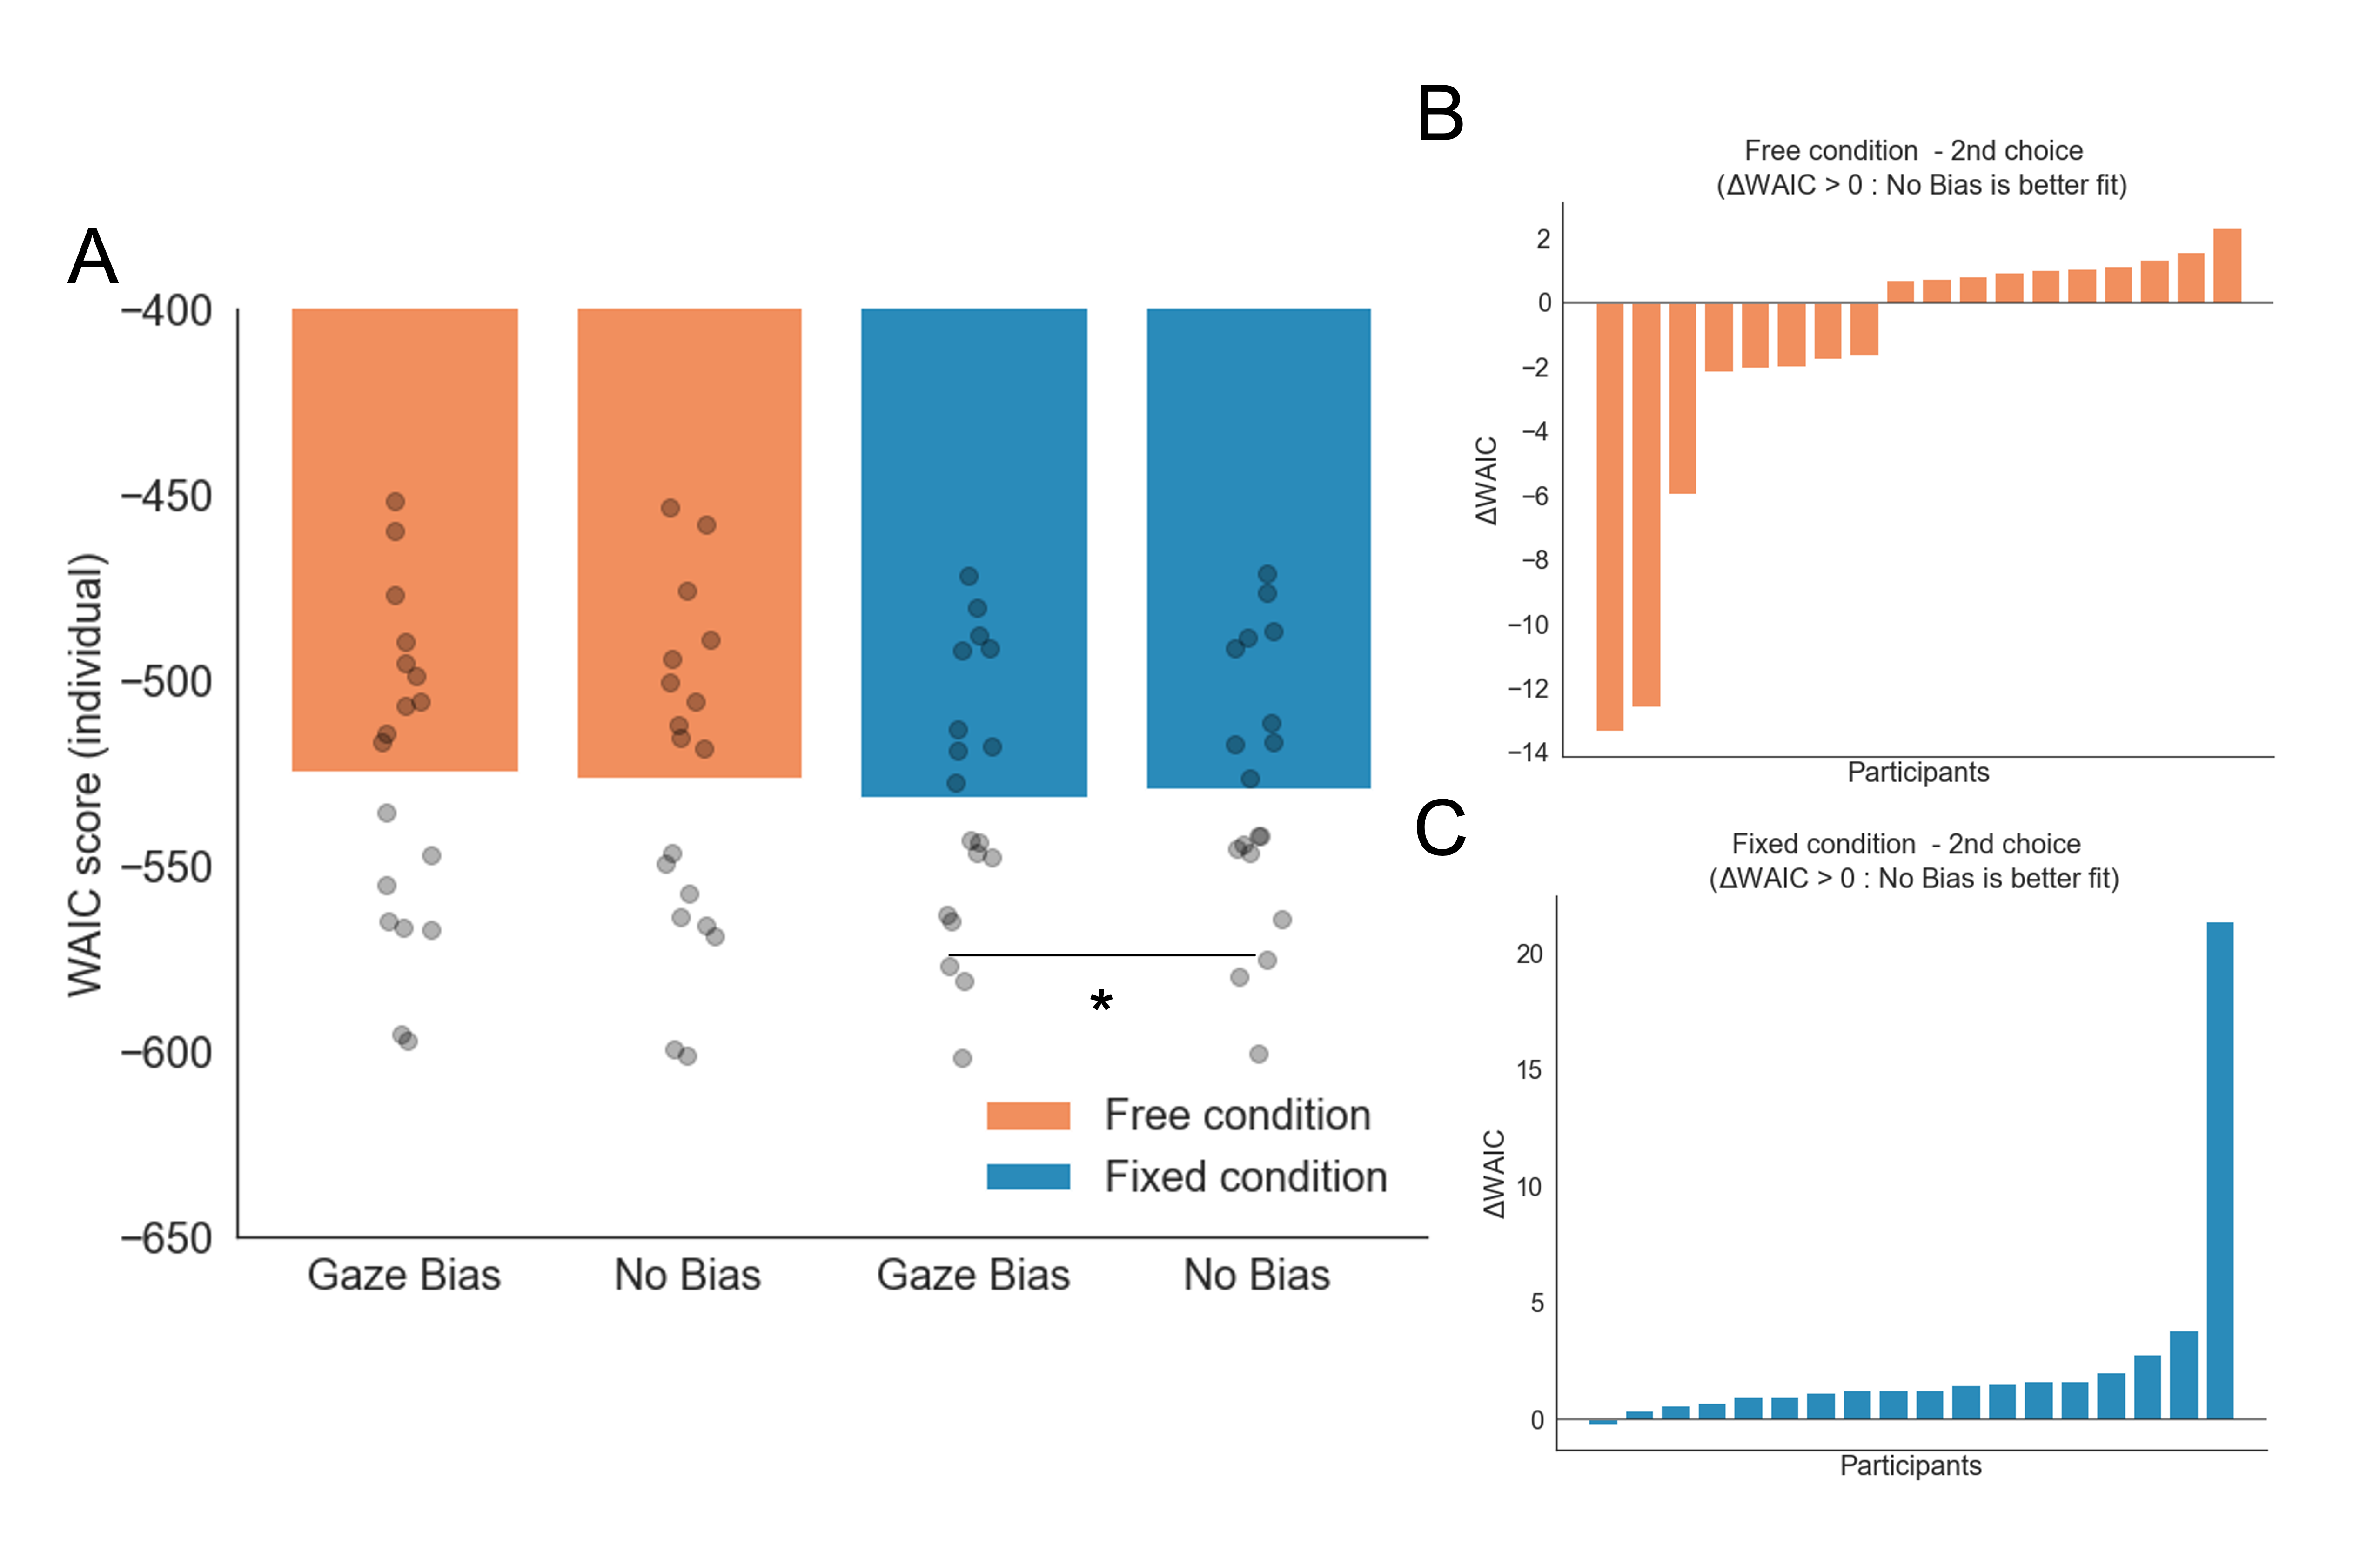

Supplement: supp [file elife-71768-supp-v1.zip › elife_poa_e71768_Figure_5_figure_supplement_3.png]

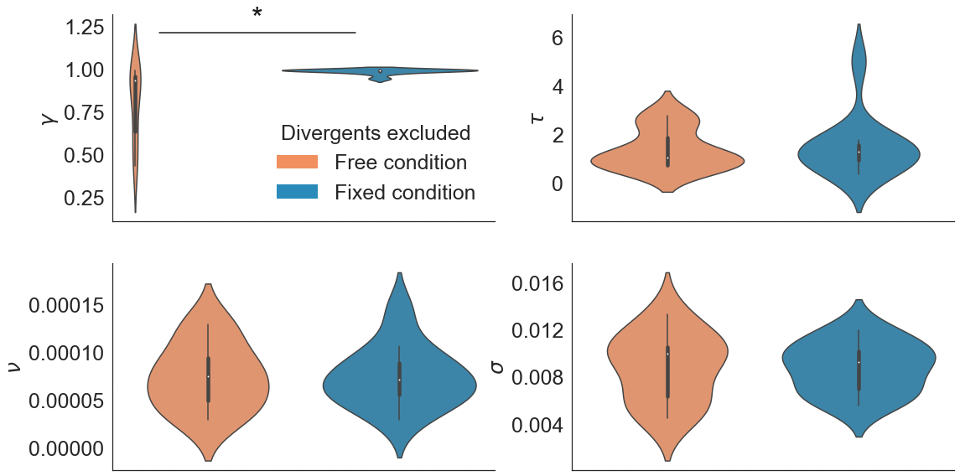

Supplement: supp [file elife-71768-supp-v1.zip › elife_poa_e71768_Figure_5_figure_supplement_4.png]
